# Supplementary material for: Effect of the Alkaline Metal Ion on the Crystal Structure and Magnetic Properties of Heterometallic GdIII-VIV Complexes Based on Cyclobutane-1,1-Dicarboxylate Anions
Source: MDPI journal article supplement (doi:10.3390/magnetochemistry7060082), 2021-06-03
Supplement: s1 [file s1]

# Supplementary Materials: Effect of the Alkaline Metal Ion on the Crystal Structure and Magnetic Properties of Heterometallic Gd<sup>III</sup>-V<sup>IV</sup> Complexes Based on Cyclobutane-1,1-Dicarboxylate Anions

Evgeniya S. Bazhina <sup>1,\*</sup>, Alexander A. Korlyukov <sup>2</sup>, Julia K. Voronina <sup>1</sup>, Konstantin A. Babeshkin <sup>1</sup>, Elena A. Ugolkova <sup>1</sup>, Nikolay N. Efimov <sup>1</sup>, Matvey V. Fedin <sup>3</sup>, Mikhail A. Kiskin <sup>1,\*</sup> and Igor L. Eremenko <sup>1,2</sup>

<sup>1</sup> N.S. Kurnakov Institute of General and Inorganic Chemistry of the Russian Academy of Sciences, Leninskiy prosp. 31, 119991 Moscow, Russia; juliavoronina@mail.ru (J.K.V.); bkonstantan@yandex.ru (K.A.B.); tipperiri@yandex.ru (E.A.U.); nnefimov@yandex.ru (N.N.E.); ilerem@igic.ras.ru (I.L.E.)

<sup>2</sup> A.N. Nesmeyanov Institute of Organoelement Compounds of the Russian Academy of Sciences, Vavilova str. 28, 119991 Moscow, Russia; alex@xrlab.ineos.ac.ru

<sup>3</sup> International Tomography Center of the Siberian Branch of the Russian Academy of Sciences, Institutskaya str. 3a, 630090 Novosibirsk, Russia; mfedin@tomo.nsc.ru

\* Correspondence: evgenia-vo@mail.ru (E.S.B.); mkiskin@igic.ras.ru (M.A.K.)

## S-I. Crystal structure description

**Table S1.** Selected bond lengths *d* (Å) and angles  $\omega$  (°) for **1**.

| Bond                   | <i>d</i>   | Bond                    | <i>d</i>   |
|------------------------|------------|-------------------------|------------|
| V1–O5                  | 1.5968(19) | Gd1–O12 <sup>(i)</sup>  | 2.3997(18) |
| V1–O4                  | 1.9632(17) | Gd1–O11                 | 2.4092(18) |
| V1–O3                  | 1.9754(17) | Gd1–O11 <sup>(i)</sup>  | 2.4093(18) |
| V1–O1                  | 1.9906(17) | Na1–O6                  | 2.4170(19) |
| V1–O2                  | 2.0208(17) | Na1–O6 <sup>(ii)</sup>  | 2.4170(19) |
| V1–O6                  | 2.2995(18) | Na1–O14                 | 2.445(2)   |
| Gd1–O13                | 2.3723(17) | Na1–O14 <sup>(ii)</sup> | 2.445(2)   |
| Gd1–O13 <sup>(i)</sup> | 2.3723(17) | Na1–O3                  | 2.5359(17) |
| Gd1–O7                 | 2.3785(17) | Na1–O3 <sup>(ii)</sup>  | 2.5358(17) |
| Gd1–O7 <sup>(i)</sup>  | 2.3785(17) | Na1–O1                  | 2.631(2)   |
| Gd1–O12                | 2.3996(18) | Na1–O1 <sup>(ii)</sup>  | 2.631(2)   |

  

| Angle    | $\omega$  | Angle                                      | $\omega$  |
|----------|-----------|--------------------------------------------|-----------|
| O5–V1–O4 | 101.17(9) | O13–Gd1–O12                                | 149.67(6) |
| O5–V1–O3 | 99.83(8)  | O7–Gd1–O12                                 | 90.69(6)  |
| O4–V1–O3 | 89.33(7)  | O7 <sup>(i)</sup> –Gd1–O12                 | 101.97(6) |
| O5–V1–O1 | 101.69(9) | O13 <sup>(i)</sup> –Gd1–O12 <sup>(i)</sup> | 149.67(6) |
| O4–V1–O1 | 157.10(8) | O13–Gd1–O12 <sup>(i)</sup>                 | 71.56(6)  |
| O3–V1–O1 | 85.60(7)  | O7–Gd1–O12 <sup>(i)</sup>                  | 101.97(6) |
| O5–V1–O2 | 100.21(8) | O7 <sup>(i)</sup> –Gd1–O12 <sup>(i)</sup>  | 90.69(6)  |
| O4–V1–O2 | 90.27(7)  | O12–Gd1–O12 <sup>(i)</sup>                 | 138.67(9) |
| O3–V1–O2 | 159.65(7) | O13 <sup>(i)</sup> –Gd1–O11                | 119.89(6) |
| O1–V1–O2 | 86.89(7)  | O13–Gd1–O11                                | 131.58(6) |
| O5–V1–O6 | 177.80(9) | O7–Gd1–O11                                 | 147.67(6) |
| O4–V1–O6 | 79.87(7)  | O7 <sup>(i)</sup> –Gd1–O11                 | 67.73(6)  |
| O3–V1–O6 | 78.21(7)  | O12–Gd1–O11                                | 70.10(6)  |
| O1–V1–O6 | 77.24(7)  | O12 <sup>(i)</sup> –Gd1–O11                | 79.12(7)  |

|                                           |           |                                            |           |
|-------------------------------------------|-----------|--------------------------------------------|-----------|
| O2–V1–O6                                  | 81.69(7)  | O13i–Gd1–O11 <sup>(i)</sup>                | 131.58(6) |
| O13 <sup>(i)</sup> –Gd1–O13               | 78.41(9)  | O13–Gd1–O11 <sup>(i)</sup>                 | 119.89(6) |
| O13 <sup>(i)</sup> –Gd1–O7                | 74.86(6)  | O7–Gd1–O11 <sup>(i)</sup>                  | 67.73(6)  |
| O13–Gd1–O7                                | 77.26(6)  | O7 <sup>(i)</sup> –Gd1–O11 <sup>(i)</sup>  | 147.67(6) |
| O13 <sup>(i)</sup> –Gd1–O7 <sup>(i)</sup> | 77.26(6)  | O12–Gd1–O11 <sup>(i)</sup>                 | 79.12(7)  |
| O13–Gd1–O7 <sup>(i)</sup>                 | 74.86(6)  | O12 <sup>(i)</sup> –Gd1–O11 <sup>(i)</sup> | 70.10(6)  |
| O7–Gd1–O7 <sup>(i)</sup>                  | 143.79(8) | O11–Gd1–O11 <sup>(i)</sup>                 | 82.86(9)  |
| O13 <sup>(i)</sup> –Gd1–O12               | 71.56(6)  |                                            |           |

Symmetry codes: (i)  $-x+1, y, -z+1/2$ ; (ii)  $-x, y, -z+1/2$ .

**Table S2.** Selected bond lengths  $d$  (Å) and angles  $\omega$  (°) for **2**.

| Bond       | $d$        | Bond                     | $d$       |
|------------|------------|--------------------------|-----------|
| V1–O1      | 1.589(3)   | Gd1–O13W                 | 2.450(2)  |
| V1–O2      | 2.001(2)   | Gd1–O15                  | 2.821(2)  |
| V1–O3      | 2.009(2)   | Gd1–O18                  | 2.454(2)  |
| V1–O4W     | 2.238(2)   | Rb1–O3 <sup>(i)</sup>    | 3.060(2)  |
| V1–O6      | 2.010(2)   | Rb1–O3W                  | 3.477(2)  |
| V1–O7      | 2.019(2)   | Rb1–O7 <sup>(i)</sup>    | 2.981(2)  |
| V2–O3W     | 2.417(2)   | Rb1–O8W <sup>(ii)</sup>  | 3.144(2)  |
| V2–O10     | 1.990(2)   | Rb1–O10                  | 3.371(2)  |
| V2–O11     | 2.001(2)   | Rb1–O11W                 | 3.499(3)  |
| V2–O14     | 1.584(2)   | Rb1–O12                  | 2.908(2)  |
| V2–O15     | 2.016(2)   | Rb1–O12W                 | 2.845(2)  |
| V2–O16     | 1.984(2)   | Rb1–O13 <sup>(iii)</sup> | 2.843(2)  |
| Gd1–O5     | 2.363(2)   | Rb1–O13W                 | 3.002(2)  |
| Gd1–O6W    | 2.491(2)   | O3–Rb1 <sup>(iv)</sup>   | 3.060(2)  |
| Gd1–O7W    | 2.331(2)   | O7–Rb1 <sup>(iv)</sup>   | 2.981(2)  |
| Gd1–O8W    | 2.473(2)   | O8W–Rb1 <sup>(ii)</sup>  | 3.144(2)  |
| Gd1–O9W    | 2.390(2)   | O13–Rb1 <sup>(iii)</sup> | 2.843(2)  |
| Gd1–O10W   | 2.379(2)   |                          |           |
| Angle      | $\omega$   | Angle                    | $\omega$  |
| O1–V1–O2   | 100.60(11) | O5–Gd1–O10W              | 77.37(8)  |
| O1–V1–O3   | 99.59(11)  | O5–Gd1–O13W              | 129.85(8) |
| O1–V1–O4W  | 178.76(12) | O5–Gd1–O15               | 69.67(7)  |
| O1–V1–O6   | 99.92(11)  | O5–Gd1–O18               | 79.73(7)  |
| O1–V1–O7   | 98.83(11)  | O6W–Gd1–O15              | 106.13(7) |
| O2–V1–O3   | 87.07(9)   | O7W–Gd1–O5               | 137.66(8) |
| O2–V1–O4W  | 79.88(9)   | O7W–Gd1–O6W              | 69.47(8)  |
| O2–V1–O6   | 88.00(9)   | O7W–Gd1–O8W              | 68.03(8)  |
| O2–V1–O7   | 160.51(10) | O7W–Gd1–O9W              | 96.61(9)  |
| O3–V1–O4W  | 79.28(10)  | O7W–Gd1–O10W             | 85.14(9)  |
| O3–V1–O6   | 160.44(10) | O7W–Gd1–O13W             | 79.34(8)  |
| O3–V1–O7   | 91.20(9)   | O7W–Gd1–O15              | 141.62(8) |
| O6–V1–O4W  | 81.23(9)   | O7W–Gd1–O18              | 140.35(8) |
| O6–V1–O7   | 87.19(9)   | O8W–Gd1–O6W              | 120.27(8) |
| O7–V1–O4W  | 80.72(9)   | O8W–Gd1–O15              | 133.14(7) |
| O10–V2–O3W | 78.25(9)   | O9W–Gd1–O6W              | 69.89(8)  |
| O10–V2–O11 | 86.70(9)   | O9W–Gd1–O8W              | 75.48(8)  |

|            |            |               |           |
|------------|------------|---------------|-----------|
| O10–V2–O15 | 86.82(9)   | O9W–Gd1–O13W  | 140.28(8) |
| O11–V2–O3W | 81.66(9)   | O9W–Gd1–O15   | 118.21(7) |
| O11–V2–O15 | 158.56(10) | O9W–Gd1–O18   | 75.35(8)  |
| O14–V2–O3W | 176.07(11) | O10W–Gd1–O6W  | 140.19(8) |
| O14–V2–O10 | 103.63(11) | O10W–Gd1–O8W  | 73.57(8)  |
| O14–V2–O11 | 101.82(11) | O10W–Gd1–O9W  | 145.76(8) |
| O14–V2–O15 | 99.56(11)  | O10W–Gd1–O13W | 73.77(8)  |
| O14–V2–O16 | 102.08(11) | O10W–Gd1–O15  | 75.11(7)  |
| O15–V2–O3W | 77.02(9)   | O10W–Gd1–O18  | 123.22(8) |
| O16–V2–O3W | 75.97(9)   | O13W–Gd1–O6W  | 71.80(8)  |
| O16–V2–O10 | 154.22(10) | O13W–Gd1–O8W  | 135.13(8) |
| O16–V2–O11 | 89.94(9)   | O13W–Gd1–O15  | 63.78(7)  |
| O16–V2–O15 | 87.08(9)   | O13W–Gd1–O18  | 82.97(8)  |
| O5–Gd1–O6W | 141.46(8)  | O18–Gd1–O6W   | 71.36(8)  |
| O5–Gd1–O8W | 70.10(8)   | O18–Gd1–O8W   | 141.34(7) |
| O5–Gd1–O9W | 78.66(8)   | O18–Gd1–O15   | 48.23(7)  |

Symmetry codes: (i)  $x-1/2, y+1/2, z$ ; (ii)  $-x+1, -y+2, -z+1$ ; (iii)  $-x+1, y, -z+3/2$ ; (iv)  $x+1/2, y-1/2, z$ .

**Table S3.** Selected bond lengths  $d$  (Å) and angles  $\omega$  (°) for **3**.

| Bond       | $d$        | Bond        | $d$        |
|------------|------------|-------------|------------|
| V1–O8      | 2.005 (3)  | Gd1–O16     | 2.414 (3)  |
| V1–O16W    | 2.251 (4)  | Gd1–O13W    | 2.422 (3)  |
| V1–O2      | 1.997 (3)  | Gd1–O12W    | 2.422 (4)  |
| V1–O4      | 1.994 (3)  | Gd1–O4W     | 2.383 (4)  |
| V1–O6      | 2.002 (3)  | Gd1–O1W     | 2.465 (4)  |
| V1–O1      | 1.589 (4)  | Cs1–O13i    | 3.478 (4)  |
| V2–O14     | 1.998 (3)  | Cs1–O8      | 3.313 (3)  |
| V2–O11W    | 2.369 (4)  | Cs1–O5      | 3.611 (4)  |
| V2–O11     | 2.002 (4)  | Cs1–O16W    | 3.163 (4)  |
| V2–O15     | 2.017 (3)  | Cs1–O14W    | 3.470 (4)  |
| V2–O17     | 1.983 (4)  | Cs1–O12     | 3.163 (4)  |
| V2–O10     | 1.581 (4)  | Cs1–O4      | 3.111 (3)  |
| Gd1–O15    | 2.732 (3)  | Cs1–O9W     | 3.409 (4)  |
| Gd1–O2W    | 2.478 (3)  | Cs1–O13W    | 3.250 (3)  |
| Gd1–O9     | 2.326 (3)  | Cs1–O15W    | 3.301 (4)  |
| Gd1–O5W    | 2.455 (4)  |             |            |
| Angle      | $\omega$   | Angle       | $\omega$   |
| O8–V1–O16W | 77.38(14)  | O9–Gd1–O5W  | 75.96(12)  |
| O2–V1–O8   | 156.21(15) | O9–Gd1–O16  | 84.64(12)  |
| O2–V1–O16W | 79.39(14)  | O9–Gd1–O13W | 77.33(12)  |
| O2–V1–O6   | 84.52(14)  | O9–Gd1–O12W | 129.36(12) |
| O4–V1–O8   | 90.51(14)  | O9–Gd1–O4W  | 75.48(12)  |
| O4–V1–O16W | 77.93(14)  | O9–Gd1–O1W  | 142.86(12) |
| O4–V1–O2   | 89.58(14)  | O5W–Gd1–O15 | 139.43(11) |
| O4–V1–O6   | 161.49(15) | O5W–Gd1–O2W | 112.45(12) |
| O6–V1–O8   | 87.94(14)  | O5W–Gd1–O1W | 68.58(12)  |
| O6–V1–O16W | 83.73(14)  | O16–Gd1–O15 | 49.50(11)  |
| O1–V1–O8   | 102.59(17) | O16–Gd1–O2W | 66.14(12)  |

|             |            |               |            |
|-------------|------------|---------------|------------|
| O1–V1–O16W  | 178.16(18) | O16–Gd1–O5W   | 146.86(12) |
| O1–V1–O2    | 100.81(17) | O16–Gd1–O13W  | 124.66(12) |
| O1–V1–O4    | 100.24(17) | O16–Gd1–O12W  | 80.32(12)  |
| O1–V1–O6    | 98.10(18)  | O16–Gd1–O1W   | 131.85(12) |
| O14–V2–O11W | 82.48(14)  | O13W–Gd1–O15  | 75.22(11)  |
| O14–V2–O11  | 87.23(14)  | O13W–Gd1–O2W  | 144.23(12) |
| O14–V2–O15  | 161.38(15) | O13W–Gd1–O5W  | 77.18(12)  |
| O11–V2–O11W | 79.24(14)  | O13W–Gd1–O12W | 72.62(12)  |
| O11–V2–O15  | 87.62(14)  | O13W–Gd1–O1W  | 84.29(12)  |
| O15–V2–O11W | 78.99(13)  | O12W–Gd1–O15  | 64.09(11)  |
| O17–V2–O14  | 89.77(14)  | O12W–Gd1–O2W  | 76.75(12)  |
| O17–V2–O11W | 76.08(14)  | O12W–Gd1–O5W  | 132.64(12) |
| O17–V2–O11  | 155.31(15) | O12W–Gd1–O1W  | 72.82(12)  |
| O17–V2–O15  | 87.47(14)  | O4W–Gd1–O15   | 118.80(11) |
| O10–V2–O14  | 100.54(17) | O4W–Gd1–O2W   | 69.95(12)  |
| O10–V2–O11W | 175.26(16) | O4W–Gd1–O5W   | 69.96(12)  |
| O10–V2–O11  | 104.47(17) | O4W–Gd1–O16   | 79.37(12)  |
| O10–V2–O15  | 98.07(17)  | O4W–Gd1–O13W  | 141.35(12) |
| O10–V2–O17  | 100.17(17) | O4W–Gd1–O12W  | 145.81(12) |
| O2W–Gd1–O15 | 107.35(11) | O4W–Gd1–O1W   | 101.55(12) |
| O9–Gd1–O15  | 69.41(11)  | O1W–Gd1–O15   | 136.02(11) |
| O9–Gd1–O2W  | 137.84(12) | O1W–Gd1–O2W   | 69.20(12)  |

Symmetry codes: (i)  $-x+2, -y+2, -z+1$ .

**Table S4.** Continuous shape measures (CSHm) for GdOs coordination polyhedra in compounds **1–3**. The lowest SHAPE values are shown highlighted indicating best fits.

| Structure ML <sub>s</sub> | SAPR-8       | TDD-8        | JBTPR-8 | BTPR-8       | JSD-8 |
|---------------------------|--------------|--------------|---------|--------------|-------|
| <b>1</b>                  | 1.610        | <b>0.661</b> | 3.174   | 2.563        | 3.920 |
| <b>2</b>                  | 1.021        | 1.941        | 1.391   | <b>0.681</b> | 3.734 |
| <b>3</b>                  | <b>0.760</b> | 1.841        | 2.264   | 1.371        | 4.711 |

Codes: SAPR-8 (D4d) Square antiprism; TDD-8 (D2d) Triangular dodecahedron; JBTPR-8 (C2v) Biaugmented trigonal prism J50; BTPR-8 (C2v) Biaugmented trigonal prism; JSD-8 (D2d) Snub diphenoid J84.

**Table S5.** Hydrogen bonding parameters of structure **1**.

| Fragment D–H...A               | Distance/ Å |       |          | D–H...A /° |
|--------------------------------|-------------|-------|----------|------------|
|                                | D–H         | H...A | D...A    |            |
| O11–H11...O7 <sup>(i)</sup>    | 0.91        | 2.35  | 2.668(3) | 100        |
| O11–H11'...O14 <sup>(ii)</sup> | 0.90        | 1.76  | 2.628(3) | 161        |
| O12–H12...O9 <sup>(ii)</sup>   | 0.87        | 1.93  | 2.787(3) | 168        |
| O12–H12'...O5 <sup>(iii)</sup> | 0.84        | 1.93  | 2.759(3) | 171        |
| O13–H13...O8 <sup>(iv)</sup>   | 0.83        | 1.88  | 2.697(3) | 172        |
| O13–H13'...O2 <sup>(i)</sup>   | 0.82        | 2.00  | 2.716(3) | 146        |
| O14–H14...O3 <sup>(iv)</sup>   | 0.95        | 2.42  | 3.099(3) | 128        |
| O14–H14...O9 <sup>(iv)</sup>   | 0.95        | 2.00  | 2.815(3) | 143        |
| O14–H14'...O10 <sup>(i)</sup>  | 0.95        | 1.82  | 2.714(3) | 156        |
| O6–H61...O8 <sup>(iv)</sup>    | 0.95        | 1.82  | 2.733(3) | 160        |
| O6–H62...O10 <sup>(i)</sup>    | 0.95        | 1.85  | 2.765(3) | 161        |
| C6–H6A...O8                    | 0.99        | 2.48  | 2.846(4) | 101        |

|                              |      |      |          |     |
|------------------------------|------|------|----------|-----|
| C6–H6B...O7                  | 0.99 | 2.41 | 2.795(3) | 102 |
| C10–H10B...O9 <sup>(v)</sup> | 0.99 | 2.60 | 3.456(3) | 145 |
| C12–H12B...O10               | 0.99 | 2.47 | 2.846(3) | 102 |

Symmetry codes: (i) 1–x, y, 1/2–z; (ii) 1/2+x, 1/2+y, z; (iii) 1–x, 1–y, 1–z; (iv) –x, y, 1/2–z; (v) 1/2–x, 1/2–y, 1–z.

Table S6. Hydrogen bonding parameters of structure 2.

| Fragment D–H...A | Distance/ Å |       |          | D–H...A /° |
|------------------|-------------|-------|----------|------------|
|                  | D–H         | H...A | D...A    |            |
| O4W–H4WB...O5W   | 0.85        | 1.94  | 2.785(3) | 174.0      |
| O9W–H9WA...O5W   | 0.85        | 1.83  | 2.643(3) | 158.9      |
| O10W–H10B...O10  | 0.85        | 1.89  | 2.729(3) | 170.7      |
| O13W–H13B...O3W  | 0.85        | 2.00  | 2.852(3) | 175.9      |
| O2W–H2W...O17    | 0.85        | 1.92  | 2.758(4) | 167.3      |
| O5W–H5WA...O1W   | 0.85        | 2.14  | 2.849(4) | 140.7      |

Table S7. Hydrogen bonding parameters of structure 3.

| Fragment D–H...A                 | Distance/ Å |          |           | D–H...A /° |
|----------------------------------|-------------|----------|-----------|------------|
|                                  | D–H         | H...A    | D...A     |            |
| O6W–H6WA...O7 <sup>(i)</sup>     | 0.85        | 1.81     | 2.629 (5) | 161.0      |
| O6W–H6WB...O10W <sup>(ii)</sup>  | 0.85        | 1.83     | 2.672 (5) | 170.4      |
| O16W–H16A...O6W                  | 0.85        | 1.81     | 2.653 (5) | 168.6      |
| O16W–H16B...O3 <sup>(iii)</sup>  | 0.85        | 1.83     | 2.658 (5) | 163.6      |
| O2W–H2WA...O10W <sup>(iv)</sup>  | 0.85        | 1.87     | 2.704 (5) | 168.9      |
| O2W–H2WB...O8W <sup>(v)</sup>    | 0.85        | 2.07     | 2.872 (5) | 158.1      |
| O14W–H14A...O7W                  | 0.85        | 1.96     | 2.781 (5) | 161.1      |
| O14W–H14B...O2W <sup>(vi)</sup>  | 0.85        | 2.13     | 2.897 (5) | 149.3      |
| O10W–H10C...O18                  | 0.85        | 1.86     | 2.675 (5) | 161.5      |
| O10W–H10D...O9W <sup>(vii)</sup> | 0.85        | 1.94     | 2.786 (5) | 173.3      |
| O5W–H5WA...O6W                   | 0.85        | 1.84     | 2.662 (5) | 163.6      |
| O5W–H5WB...O14W                  | 0.85        | 1.89     | 2.736 (5) | 170.9      |
| O3W–H3WA...O2 <sup>(i)</sup>     | 0.85        | 2.03     | 2.879 (5) | 176.9      |
| O3W–H3WB...O5 <sup>(v)</sup>     | 0.85        | 2.00     | 2.773 (5) | 150.8      |
| O7W–H7WA...O13 <sup>(vii)</sup>  | 0.85        | 1.96     | 2.742 (5) | 152.0      |
| O7W–H7WB...O6 <sup>(viii)</sup>  | 0.85        | 2.06     | 2.895 (5) | 168.6      |
| O9W–H9WA...O15W <sup>(ix)</sup>  | 0.85        | 1.90     | 2.734 (5) | 168.9      |
| O9W–H9WB...O14 <sup>(vii)</sup>  | 0.85        | 2.02     | 2.826 (5) | 157.9      |
| O13W–H13A...O13 <sup>(vii)</sup> | 0.85        | 2.07     | 2.809 (5) | 144.6      |
| O13W–H13B...O11                  | 0.85        | 1.86     | 2.704 (5) | 175.5      |
| O12W–H12B...O18 <sup>(iv)</sup>  | 0.85        | 1.86     | 2.703 (5) | 168.5      |
| O4W–H4WA...O7 <sup>(i)</sup>     | 0.85        | 1.95     | 2.799 (5) | 177.5      |
| O4W–H4WB...O3W                   | 0.85        | 1.81     | 2.646 (5) | 168.8      |
| O1W–H1WA...O7W                   | 0.85        | 1.93     | 2.744 (5) | 160.4      |
| O15W–H15B...O3 <sup>(iii)</sup>  | 0.85        | 1.98     | 2.796 (5) | 160.2      |
| O8W–H8WA...O5                    | 0.85        | 1.92     | 2.744 (5) | 162.2      |
| O8W–H8WB...O9W                   | 0.85        | 1.93     | 2.779 (5) | 173.6      |
| O11W–H11A...O8W <sup>(vii)</sup> | 0.98 (2)    | 1.85 (2) | 2.821 (5) | 170 (6)    |
| O11W–H11B...O12 <sup>(vii)</sup> | 0.98 (2)    | 1.93 (5) | 2.753 (5) | 140 (6)    |

Symmetry codes: (i)  $-x+1, -y+1, -z$ ; (ii)  $x, y, z-1$ ; (iii)  $-x+1, -y+2, -z$ ; (iv)  $-x+2, -y+1, -z+1$ ; (v)  $x, y-1, z$ ; (vi)  $-x+2, -y+1, -z$ ; (vii)  $-x+2, -y+2, -z+1$ ; (viii)  $x+1, y, z$ ; (ix)  $-x+2, -y+2, -z$ .

## S-II. EPR Spectroscopy

Figure S1. shows a rough simulation of the X-band and Q-band EPR spectra of **1** at 80 K. The use of  $D \sim 0.08 \text{ cm}^{-1}$  and  $E/D \sim 0.1\text{--}0.15$  yields qualitatively reasonable agreement; although simulations do not exactly reproduce all the spectral features, they certainly reproduce correctly the width of the spectra, which is mainly determined by  $D$ . The  $g$ -value of  $g = 2$  was taken for  $\text{Gd}^{\text{III}}$ , which is typical of this ion.

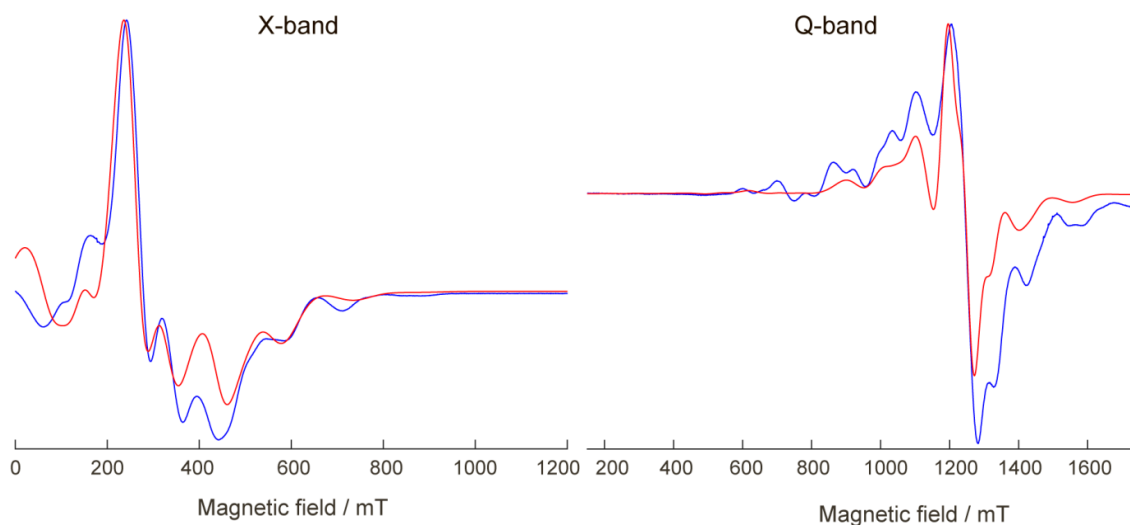

**Figure S1.** X-band (left) and Q-band (right) EPR spectra of **1** at  $T = 80 \text{ K}$ . Experiment (blue) and simulation using the parameters given in the text (red).

Figure S2 simulates the anticipated contributions of  $\text{Gd}^{\text{III}}$   $S = 7/2$  ion and two  $\text{V}^{\text{IV}}$   $S = 1/2$  ions into the overall EPR spectrum. The above parameters of ZFS and  $g = 2$  were taken for  $\text{Gd}^{\text{III}}$ . For  $\text{V}^{\text{IV}}$  ions, the data for an isostructural compound with diamagnetic  $\text{Y}^{\text{III}}$  instead of  $\text{Gd}^{\text{III}}$  was used as an estimate, namely:  $g = [1.98 \ 1.98 \ 1.94]$ ,  $A = [190 \ 190 \ 530] \text{ MHz}$  (hyperfine interaction tensor) [S1]. It is evident that the contribution of  $\text{V}^{\text{IV}}$  ions (green) is small compared to that of  $\text{Gd}^{\text{III}}$  (blue), and, given the appreciable dipolar V-Gd-V broadening, can be indistinguishable in the overall spectrum (red).

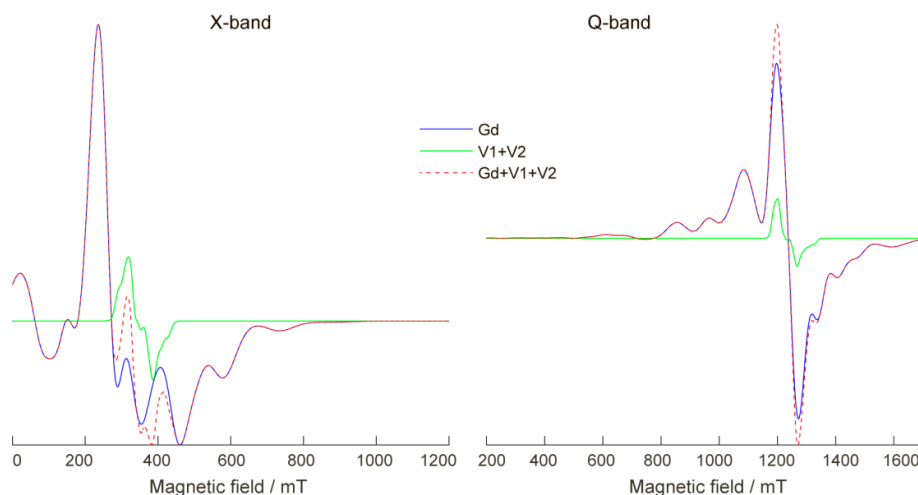

**Figure S2.** Simulations of X-band (left) and Q-band (right) EPR spectra of  $\text{Gd}^{\text{III}}$  ion, two  $\text{V}^{\text{IV}}$  ions and  $\text{V}^{\text{IV}}\text{-Gd}^{\text{III}}\text{-V}^{\text{IV}}$  triad with negligible exchange couplings. See the text for the parameters. The contribution of  $\text{Gd}^{\text{III}}$  is shown in blue, the contribution of two  $\text{V}^{\text{IV}}$  ions is shown in green, and their superposition is given in red. All the spectra are shown on the same scale without individual normalizations.

### S-III. Magnetic measurements

#### DC magnetic measurements

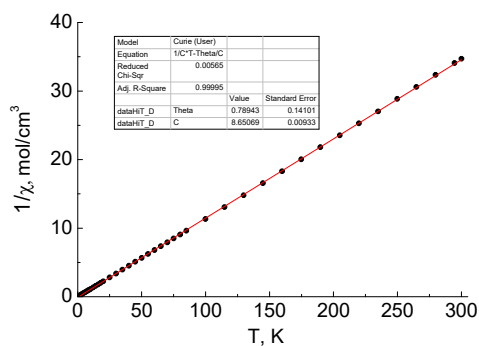

**Figure S3.** Temperature dependences of  $1/\chi$  for **1** ( $H = 5000$  Oe). Red line represents the Curie-Weiss approximation.

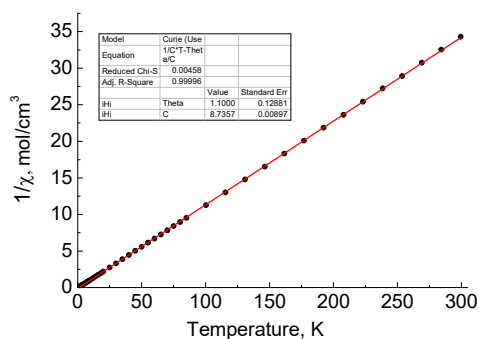

**Figure S4.** Temperature dependences of  $1/\chi$  for **2** ( $H = 5000$  Oe). Red line represents the Curie-Weiss approximation.

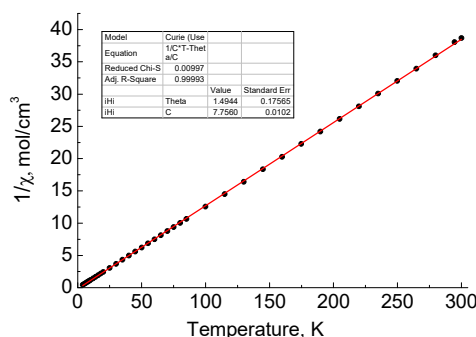

**Figure S5.** Temperature dependences of  $1/\chi$  for **3** ( $H = 5000$  Oe). Red line represents the Curie-Weiss approximation.

All of the fitting of the dc-magnetic properties was made by the use of PHI [S2]. At first, we tried to improve the approximations of **1-3** with the temperature-independent paramagnetism parameter as a variable (Table S8, Figure S6). The magnetic interactions in **1** was considered as sum of Gd...V ( $J_1$ ) and general intermolecular ( $zJ$ ) exchange. In case of complexes **2** and **3** two different Gd...V exchange interactions can be used for two different  $V^{IV}$  ions. However, for **1** the  $V^{IV}$  ions are identical, so only one Gd-V exchange parameter can be used. Because of the shape of the experimental dependence, only one variable is not enough to make a successful approximation. The inclusion of the  $zJ$  parameter in the approximation significantly improved the accordance to the experimental data for **1**.

**Table S8.** Exchange parameters from the PHI fits of **1-3** with and without temperature-independent paramagnetism (TIP) as a variable,  $D = 0$ ,  $E = 0$ .

| Complex                 | $J_1$              | $J_2$             | TIP                                     | Residuals, % |
|-------------------------|--------------------|-------------------|-----------------------------------------|--------------|
| <b>1</b>                | $0.065 \pm 0.008$  | $0.065 \pm 0.008$ | -                                       | 98.99514     |
| <b>1</b> <sub>TIP</sub> | $0.065 \pm 0.006$  | $0.065 \pm 0.006$ | $3 \cdot 10^{-4} \pm 9 \cdot 10^{-4}$   | 99.99993     |
| <b>2</b>                | $-0.089 \pm 0.008$ | $0.99 \pm 0.03$   | -                                       | 98.32253     |
| <b>2</b> <sub>TIP</sub> | $-0.087 \pm 0.007$ | $0.97 \pm 0.03$   | $2.3 \cdot 10^{-3} \pm 6 \cdot 10^{-4}$ | 97.67681     |
| <b>3</b>                | $-0.050 \pm 0.004$ | $0.656 \pm 0.009$ | -                                       | 99.66439     |
| <b>3</b> <sub>TIP</sub> | $-0.049 \pm 0.003$ | $0.651 \pm 0.008$ | $9 \cdot 10^{-4} \pm 2 \cdot 10^{-4}$   | 99.72609     |

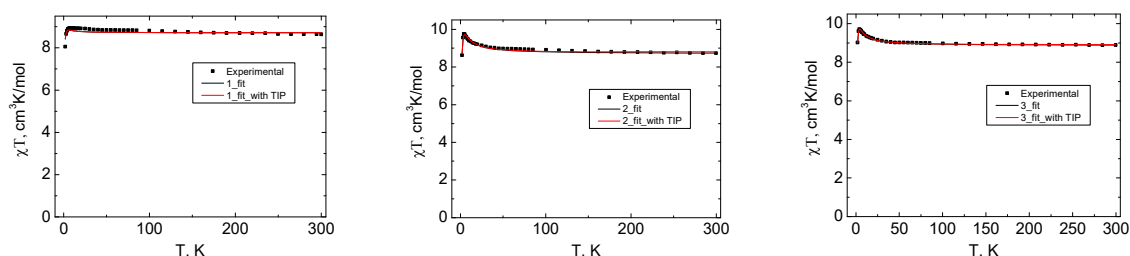

**Figure S6.** Temperature dependences of  $\chi T$  for **1-3**. The lines are approximations by PHI without (black lines) and with (red lines) the contribution of TIP.

To evaluate the effect of the zero-field splitting tensor on the magnetic properties, the approximations of  $\chi T(T)$  dependences with  $D = 0$  and  $E = 0$  has been obtained. The fitting parameters for  $D = 0$ ,  $E = 0$  case are given in Table S9. Using the calculated parameters of the isotropic Hamiltonian, the  $\chi T(T)$  dependences were simulated taking into



account the ZFS tensor. Since, in this case, only the  $|D|$  module can be calculated when determining the ZFS parameters from the EPR spectrum, the following parameters were used:  $D = \pm 0.08 \text{ cm}^{-1}$ ,  $E = 0.008 \text{ cm}^{-1}$  и  $D = \pm 0.08 \text{ cm}^{-1}$ ,  $E = 0.012 \text{ cm}^{-1}$ . The calculation results were averaged over the orientations of the molecule using the Zaremba-Conroy-Wolfsberg (ZCW=5, at ZCW>5 the same results were obtained) integration for all cases of non-zero  $D$ ,  $E$  values.

**Table S9.** Exchange parameters from the PHI fits of 1-3,  $D = 0$ ,  $E = 0$ .

| Complex | $J_1$              | $J_2$             | $zJ$                 | Residuals, % |
|---------|--------------------|-------------------|----------------------|--------------|
| 1       | $0.30 \pm 0.01$    | $0.30 \pm 0.01$   | $-0.0121 \pm 0.0006$ | 99.695       |
| 2       | $-0.089 \pm 0.008$ | $0.99 \pm 0.03$   | -                    | 98.323       |
| 3       | $-0.050 \pm 0.004$ | $0.656 \pm 0.009$ | -                    | 99.664       |

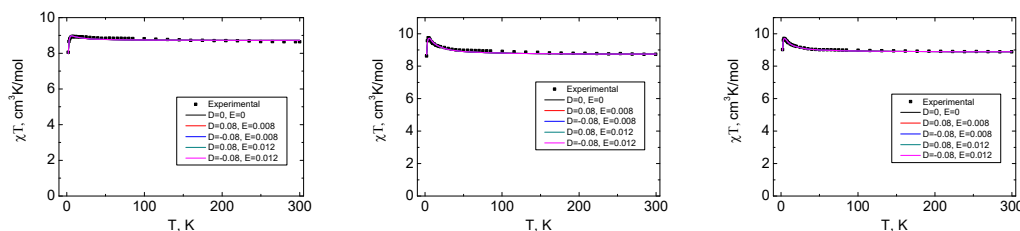

**Figure S7.** Temperature dependences of  $\chi_{MT}$  for 1-3. The lines represent the PHI approximation for  $D = 0$ ,  $E = 0$  and simulations for the different values of  $D$  and  $E$ . TIP correction was not used.

As can be seen from the figure, the influence of the ZFS tensor for all complexes on the magnetic susceptibility is vanishingly small. The Table S10 below shows the  $\chi_{MT}$  ( $\text{cm}^3\text{K/mol}$ ) values for the minimum temperature (2 K) for different magnitudes of the ZFS tensor parameters.

**Table S10.** The values of  $\chi_{MT}$  at 2 K at different values of ZFS tensor.

| Complex. | Experimental data | $D = 0, E = 0$ | $D = 0.08 \text{ cm}^{-1}, E = 0.008 \text{ cm}^{-1}$ | $D = -0.08 \text{ cm}^{-1}, E = 0.008 \text{ cm}^{-1}$ | $D = 0.08 \text{ cm}^{-1}, E = 0.012 \text{ cm}^{-1}$ | $D = -0.08 \text{ cm}^{-1}, E = 0.012 \text{ cm}^{-1}$ |
|----------|-------------------|----------------|-------------------------------------------------------|--------------------------------------------------------|-------------------------------------------------------|--------------------------------------------------------|
| 1        | 8.053             | 7.984          | 7.973                                                 | 7.975                                                  | 7.972                                                 | 7.975                                                  |
| 2        | 8.629             | 8.700          | 8.701                                                 | 8.705                                                  | 8.700                                                 | 8.704                                                  |
| 3        | 9.027             | 9.011          | 8.986                                                 | 8.981                                                  | 8.984                                                 | 8.980                                                  |

Thus, the parameters of the ZFS tensor in this case are too small to be taken into account when calculating the magnetic susceptibility. The parameters of the ZFS tensor noticeably affect the approximation of the magnetic susceptibility for orbitally degenerate ions. One of the consequences of orbital degeneracy appears to be the existence of an EPR spectrum only at helium temperatures. Since in our case the EPR spectra were observed at the temperature of liquid nitrogen and at room temperature, we subsequently restrict ourselves to isotropic exchanges.

For complexes 2 and 3 all of the different combinations of the starting exchange values ( $J_1 < 0, J_2 < 0$ ;  $J_1 > 0, J_2 < 0$ ;  $J_1 < 0, J_2 > 0$ ;  $J_1 > 0, J_2 > 0$ ;  $J_1 = 0, J_2 = 0$ ) always led to the same results. For 1, however, the second solution was found under the negative initial values of  $J$  and positive initial values of  $zJ$ . The ZCW = 5 value was fixed for all non-zero  $D$ ,  $E$  values.

**Table S11.** Exchange parameters from the PHI fits of 1 with different values of  $D$  and  $E$ .

| First solution | $J_1 = J_2 > 0$ | $zJ < 0$ | Residuals |
|----------------|-----------------|----------|-----------|
|----------------|-----------------|----------|-----------|

|                        |                                      |                               |                  |
|------------------------|--------------------------------------|-------------------------------|------------------|
| $D = 0, E = 0$         | $0.298 \pm 0.013$                    | $-0.012 \pm 0.001$            | 99.450           |
| $D = 0.08, E = 0.008$  | $0.294 \pm 0.014$                    | $-0.0118 \pm 0.0006$          | 99.449           |
| $D = -0.08, E = 0.008$ | $0.292 \pm 0.014$                    | $-0.0118 \pm 0.0006$          | 99.445           |
| $D = 0.08, E = 0.012$  | $0.293 \pm 0.014$                    | $-0.0118 \pm 0.0006$          | 99.449           |
| $D = -0.08, E = 0.012$ | $0.292 \pm 0.014$                    | $-0.0118 \pm 0.0006$          | 99.445           |
| <b>Second solution</b> | <b><math>J_1 = J_2 &lt; 0</math></b> | <b><math>zJ &gt; 0</math></b> | <b>Residuals</b> |
| $D = 0, E = 0$         | $-0.350 \pm 0.019$                   | $0.038 \pm 0.002$             | 99.584           |
| $D = 0.08, E = 0.008$  | $-0.354 \pm 0.019$                   | $0.038 \pm 0.002$             | 99.979           |
| $D = -0.08, E = 0.008$ | $-0.354 \pm 0.019$                   | $0.038 \pm 0.002$             | 99.604           |
| $D = 0.08, E = 0.012$  | $-0.354 \pm 0.019$                   | $0.038 \pm 0.002$             | 99.092           |
| $D = -0.08, E = 0.012$ | $-0.354 \pm 0.019$                   | $0.038 \pm 0.002$             | 99.605           |

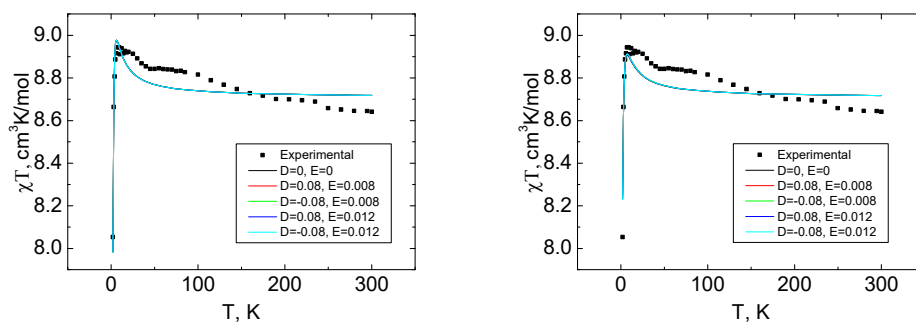

**Figure S8.** Temperature dependence of  $\chi T$  for **1**. The lines represent the PHI approximations for the different values of  $D$  and  $E$  (left – first solution  $J_1 = J_2 > 0$  and  $zJ < 0$ , right – second solution  $J_1 = J_2 < 0$  and  $zJ > 0$ ).

**Table S12.** Exchange parameters from the PHI fits of **2** with different values of  $D$  and  $E$ .

| $D, E$                 | $J_1$              | $J_2$             | Residuals |
|------------------------|--------------------|-------------------|-----------|
| $D = 0, E = 0$         | $-0.089 \pm 0.008$ | $0.989 \pm 0.028$ | 98.323    |
| $D = 0.08, E = 0.008$  | $-0.083 \pm 0.008$ | $0.981 \pm 0.028$ | 99.790    |
| $D = -0.08, E = 0.008$ | $-0.084 \pm 0.008$ | $0.979 \pm 0.028$ | 99.293    |
| $D = 0.08, E = 0.012$  | $-0.083 \pm 0.008$ | $0.981 \pm 0.028$ | 99.354    |
| $D = -0.08, E = 0.012$ | $-0.084 \pm 0.008$ | $0.979 \pm 0.028$ | 99.166    |

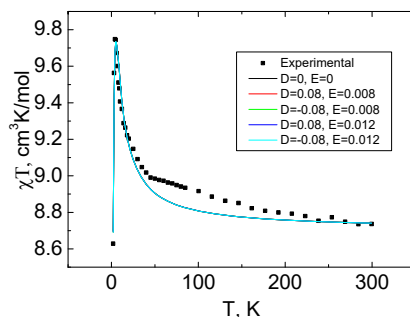

**Figure S9.** Temperature dependence of  $\chi T$  for **2**. The lines represent the PHI approximations for the different values of  $D$  and  $E$ .

**Table S13.** Exchange parameters from the PHI fits of **3** with different values of  $D$  and  $E$ .

| $D, E$         | $J_1$              | $J_2$             | Residuals |
|----------------|--------------------|-------------------|-----------|
| $D = 0, E = 0$ | $-0.050 \pm 0.004$ | $0.656 \pm 0.009$ | 99.664    |

|                      |                    |                   |        |
|----------------------|--------------------|-------------------|--------|
| D = 0.08, E = 0.008  | $-0.043 \pm 0.004$ | $0.648 \pm 0.009$ | 99.613 |
| D = -0.08, E = 0.008 | $-0.044 \pm 0.004$ | $0.646 \pm 0.009$ | 98.998 |
| D = 0.08, E = 0.012  | $-0.043 \pm 0.004$ | $0.648 \pm 0.009$ | 99.001 |
| D = -0.08, E = 0.012 | $-0.044 \pm 0.004$ | $0.646 \pm 0.009$ | 99.957 |

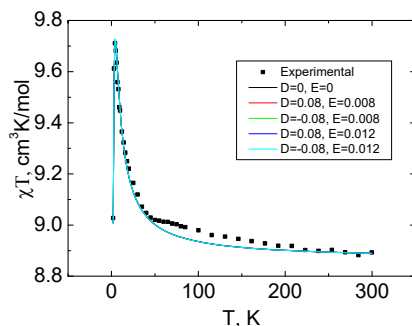

**Figure S10.** Temperature dependence of  $\chi_{\text{M}}T$  for **3**. The lines represent the PHI approximations for the different values of D and E.

The results of the approximation of  $\chi_{\text{M}}T(T)$  for **1–3**.

The interpretation of the experimental plots  $\chi_{\text{M}}T$  vs.  $T$  for compounds **2** and **3** was carried out in terms of the isotropic spin-Hamiltonian (SH) for a  $\text{Gd}^{\text{III}}$  ion ( $S_{\text{Gd}} = 7/2$ ) interacting with two  $\text{V}^{\text{IV}}$  ions ( $S_{\text{V}} = 1/2$ ):

$$H_{2,3} = -2J_1 S_{\text{Gd}} S_{\text{V}_1} - 2J_2 S_{\text{Gd}} S_{\text{V}_2} + g\beta H (S_{\text{Gd}} + S_{\text{V}_1} + S_{\text{V}_2}) \quad (1)$$

where  $J_1$  and  $J_2$  are the parameters corresponding to the  $\text{V} \cdots \text{Gd}$  exchange couplings,  $S_{\text{V}_1}$  and  $S_{\text{V}_2}$  are the spin operators of two  $\text{V}^{\text{IV}}$  ions ( $\text{V}_1$  and  $\text{V}_2$  in accordance with the structure numbering), and  $S_{\text{Gd}}$  is the spin operator of  $\text{Gd}^{\text{III}}$ . The parameter of isotropic exchange between vanadium ions was taken to be zero for compounds **2** and **3**. The best fit of the experimental data of  $\chi_{\text{M}}T$  vs.  $T$  for **2** and **3** was achieved with the following SH parameters:  $J_1 = 0.989 \pm 0.028 \text{ cm}^{-1}$ ,  $J_2 = -0.089 \pm 0.008 \text{ cm}^{-1}$ ,  $g = 2.01$  for **2** and  $J_1 = 0.656 \pm 0.009 \text{ cm}^{-1}$ ,  $J_2 = -0.04980 \pm 0.00365 \text{ cm}^{-1}$ ,  $g = 2.03$  for **3**.

For the interpretation of the temperature dependence of  $\chi_{\text{M}}T$  for complex **1**, in addition to considering the magnetic exchange between  $\text{Gd}^{\text{III}}$  and  $\text{V}^{\text{IV}}$  ions ( $J_1$ ), it is also necessary to take into account the exchange between  $\text{V}^{\text{IV}}$  ions belonging to neighbouring  $\{\text{GdV}_2\}$  units ( $J_2$ ), i.e. it is necessary to solve the SH of the linear chain:

$$H_1 = \sum_i (-2J_1 (S_{\text{Gd}}^i S_{\text{V}_1}^i + S_{\text{Gd}}^i S_{\text{V}_2}^i) - 2J_2 (S_{\text{V}_1}^{i-1} S_{\text{V}_2}^i + S_{\text{V}_1}^i S_{\text{V}_2}^{i+1}) + g\beta H (S_{\text{Gd}}^i + S_{\text{V}_1}^i + S_{\text{V}_2}^i)).$$

Since the accurate calculation of the magnetic susceptibility of an infinite chain is impossible, we calculated the magnetic susceptibility of a model ring dimer composed of two  $\{\text{GdV}_2\}$  units of compound **1** with SH:

$$H_1^{\text{mod}} = \left( -2J_1 (S_{\text{Gd}}^1 S_{\text{V}_1}^1 + S_{\text{Gd}}^1 S_{\text{V}_2}^1 + S_{\text{Gd}}^2 S_{\text{V}_1}^2 + S_{\text{Gd}}^2 S_{\text{V}_2}^2) - 2J_2 (S_{\text{V}_1}^1 S_{\text{V}_2}^2 + S_{\text{V}_1}^2 S_{\text{V}_2}^1) + g\beta H (S_{\text{Gd}}^1 + S_{\text{V}_1}^1 + S_{\text{V}_2}^1 + S_{\text{Gd}}^2 + S_{\text{V}_1}^2 + S_{\text{V}_2}^2) \right) \quad (2)$$

It should be noted that the fitting of SH (2) gives two possible sets of parameters for complex **1**:

- 1)  $J_1 (\text{V} \cdots \text{Gd}) = 0.0071 \pm 0.0016 \text{ cm}^{-1}$ ,  $J_2 (\text{V} \cdots \text{V}) = 14.7 \pm 1.3 \text{ cm}^{-1}$ ,  $g = 2.01$
- 2)  $J_1 (\text{V} \cdots \text{Gd}) = 0.1630 \pm 0.0075 \text{ cm}^{-1}$ ,  $J_2 (\text{V} \cdots \text{V}) = -1.095 \pm 0.046 \text{ cm}^{-1}$ ,  $g = 2.01$ .

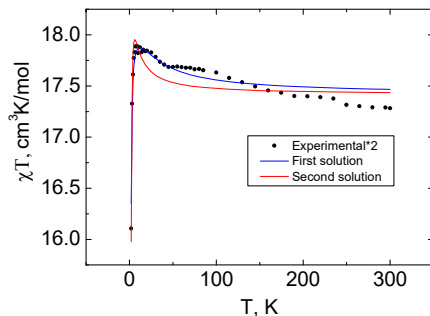

**Figure S11.** Temperature dependence of  $\chi_M T$  for **1**. The lines represent the PHI approximations for two different solutions considering the V...V interactions.

To determine which one is correct, we studied the magnetic susceptibility of an isostructural analogue of compound **1** with diamagnetic  $\text{Lu}^{\text{III}}$  ions (**1<sub>Lu</sub>**). Assuming that  $\text{V}^{\text{IV}}$  ions in **1<sub>Lu</sub>** form isolated dimers, the best agreement with experimental data is obtained with the isotropic exchange parameter  $J = -0.043 \text{ cm}^{-1}$ ,  $g = 2.0$ . Assuming that  $\text{V}^{\text{IV}}$  ions are linked in an endless chain alternately through Na and  $\text{Lu}^{\text{III}}$  ions and calculating the magnetic susceptibility of the model ring tetramer with SH

$$H_{Lu}^{\text{mod}} = \left( -2J_1(S_{V_1}^1 S_{V_2}^1 + S_{V_1}^2 S_{V_2}^2) - 2J_2(S_{V_1}^1 S_{V_2}^2 + S_{V_1}^2 S_{V_2}^1) + g\beta H(S_{V_1}^1 + S_{V_1}^2 + S_{V_2}^1 + S_{V_2}^2) \right) \quad (3)$$

we obtained  $J_1 (\text{V} \cdots \text{Gd}) = -0.3478 \pm 0.0170 \text{ cm}^{-1}$ ,  $J_2 (\text{V} \cdots \text{V}) = 0.4557 \pm 0.0356 \text{ cm}^{-1}$ ,  $g = 2$ .

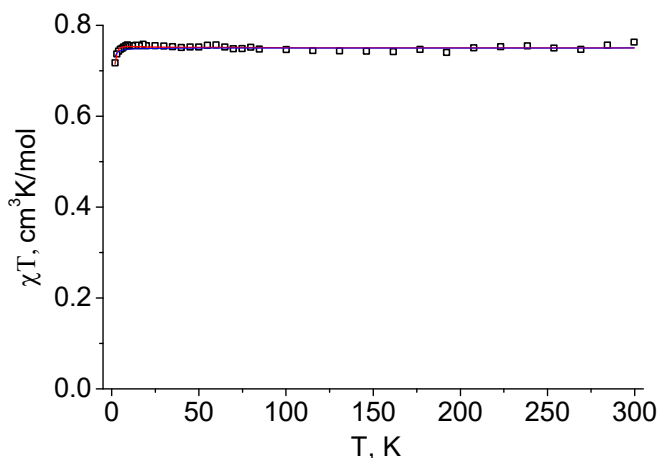

**Figure S12.** Experimental plot  $\chi_M T$  vs.  $T$  for compound **1<sub>Lu</sub>**. Blue and red lines show the values calculated for the model ring dimer and tetramer, respectively, using PHI program.

Thus, we choose the second variant of calculation for **1** with antiferromagnetic exchange between  $\text{V}^{\text{IV}}$  ions of neighboring  $\{\text{GdV}_2\}$  units and weak ferromagnetic exchange between  $\text{V}^{\text{IV}}$  and  $\text{Gd}^{\text{III}}$  ions:  $J_1 = 0.1630 \pm 0.0075 \text{ cm}^{-1}$ ,  $J_2 = -1.095 \pm 0.046 \text{ cm}^{-1}$ ,  $g = 2.01$ .

*AC magnetic measurements*

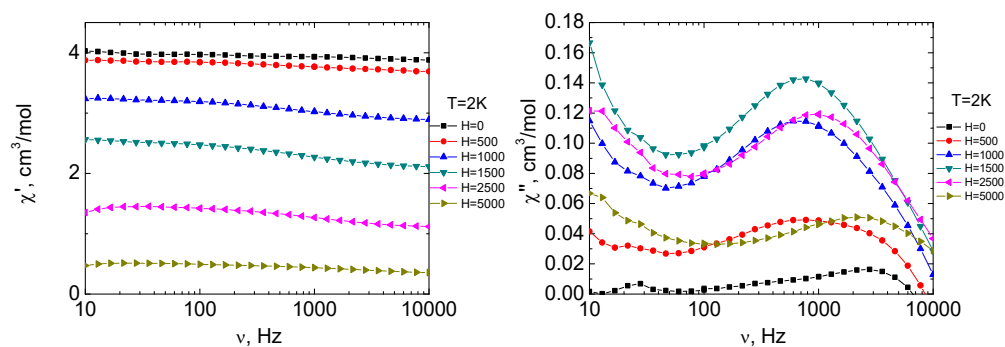

**Figure S13.** Frequency dependencies of real,  $\chi'$  (left) and imaginary,  $\chi''$  (right) components of dynamic magnetic susceptibility for complex 1 at  $T = 2$  K under various  $dc$  magnetic fields. Solid lines are visual guides.

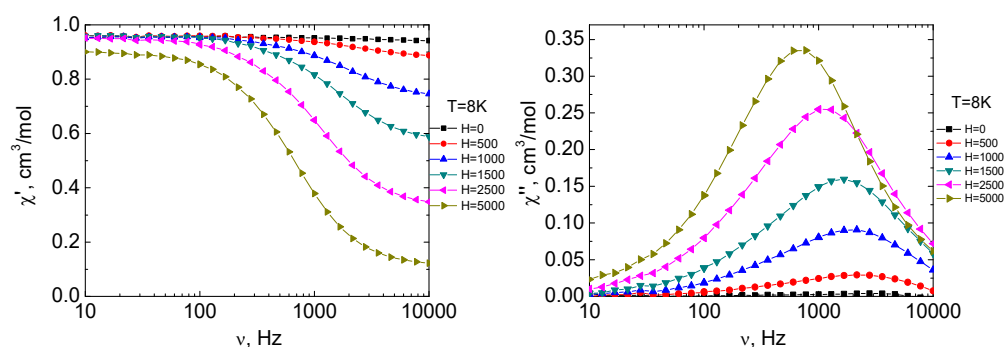

**Figure S14.** Frequency dependencies of real,  $\chi'$  (left) and imaginary,  $\chi''$  (right) components of dynamic magnetic susceptibility for complex 1 at  $T = 8$  K under various  $dc$  magnetic fields. Solid lines are visual guides.

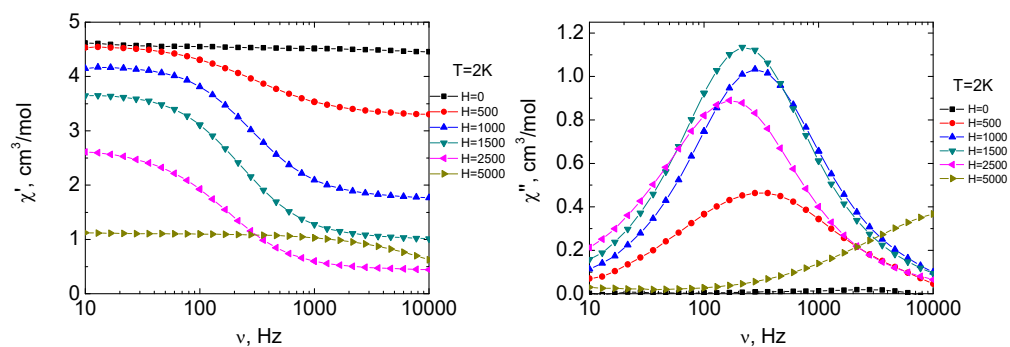

**Figure S15.** Frequency dependencies of real,  $\chi'$  (left) and imaginary,  $\chi''$  (right) components of dynamic magnetic susceptibility for complex 2 at  $T = 2$  K under various  $dc$  magnetic fields. Solid lines are visual guides.

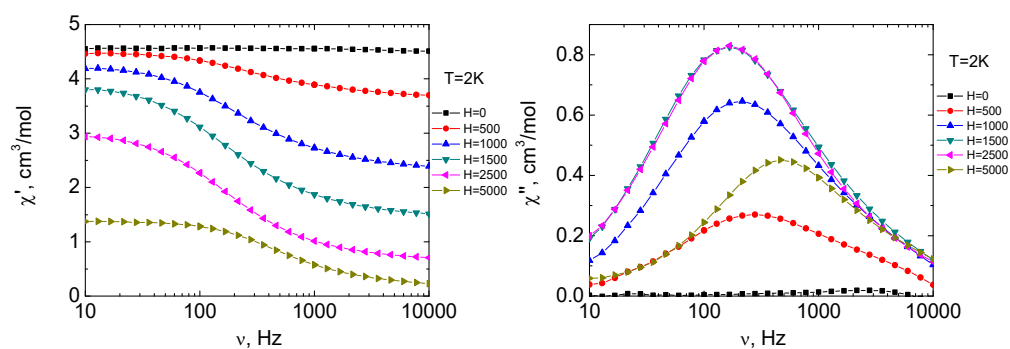

**Figure S16.** Frequency dependencies of real,  $\chi'$  (left) and imaginary,  $\chi''$  (right) components of dynamic magnetic susceptibility for complex **3** at  $T = 2$  K under various dc magnetic fields. Solid lines are visual guides.

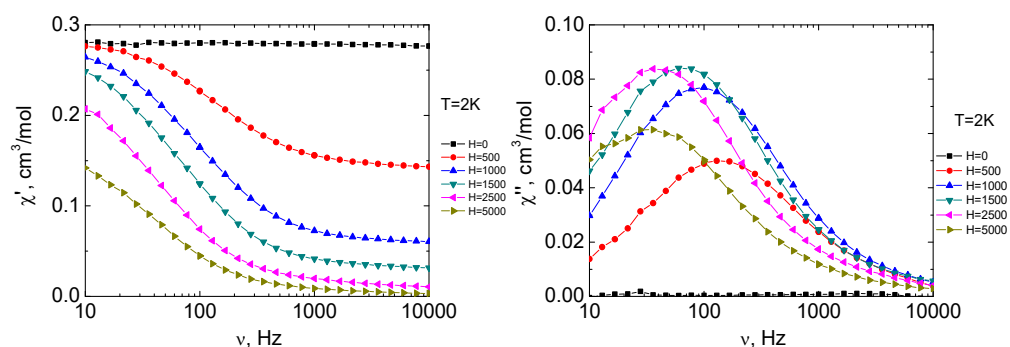

**Figure S17.** Frequency dependencies of real,  $\chi'$  (left) and imaginary,  $\chi''$  (right) components of dynamic magnetic susceptibility for complex **1L** at  $T = 2$  K under various dc magnetic fields. Solid lines are visual guides.

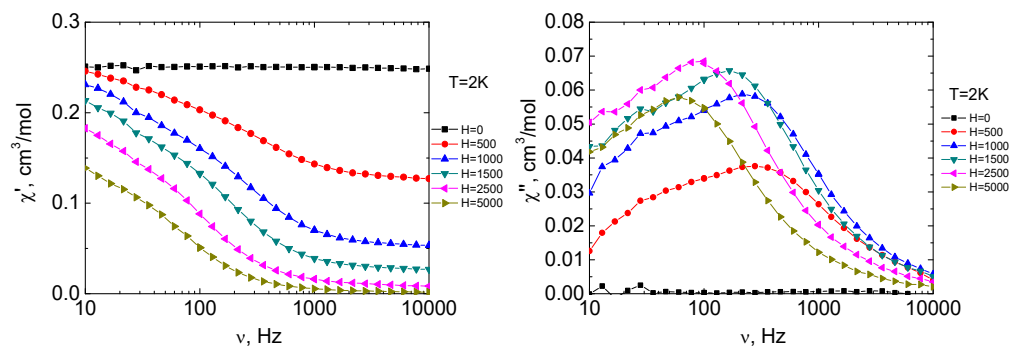

**Figure S18.** Frequency dependencies of real,  $\chi'$  (left) and imaginary,  $\chi''$  (right) components of dynamic magnetic susceptibility for complex **1V** at  $T = 2$  K under various dc magnetic fields. Solid lines are visual guides.

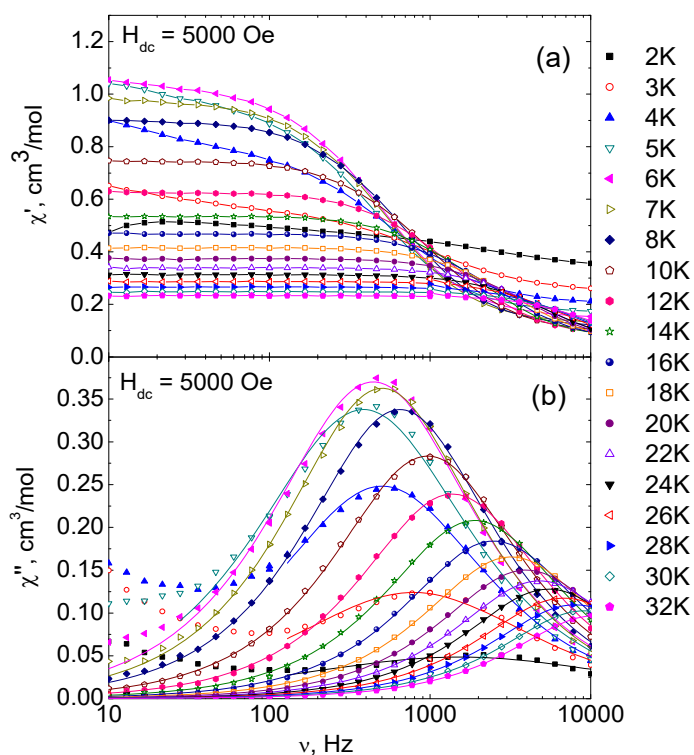

**Figure S19.** Frequency dependencies of the real (a) and imaginary (b) components of the *ac*-magnetic susceptibility for complex 1 in the 2–32 K range taken under the optimal 5000 Oe *dc*-field. Solid lines are visual guides (a), represent fitting by the generalized Debye model (b).

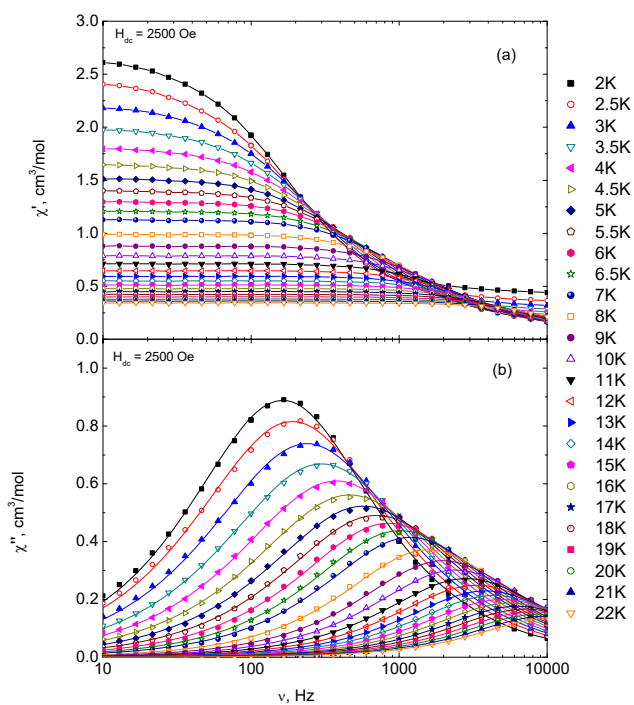

**Figure S20.** Frequency dependencies of the real (a) and imaginary (b) components of the *ac*-magnetic susceptibility for complex 2 in the 2–22 K range taken under the optimal 2500 Oe *dc*-field. Solid lines are visual guides (a), represent fitting by the generalized Debye model (b).

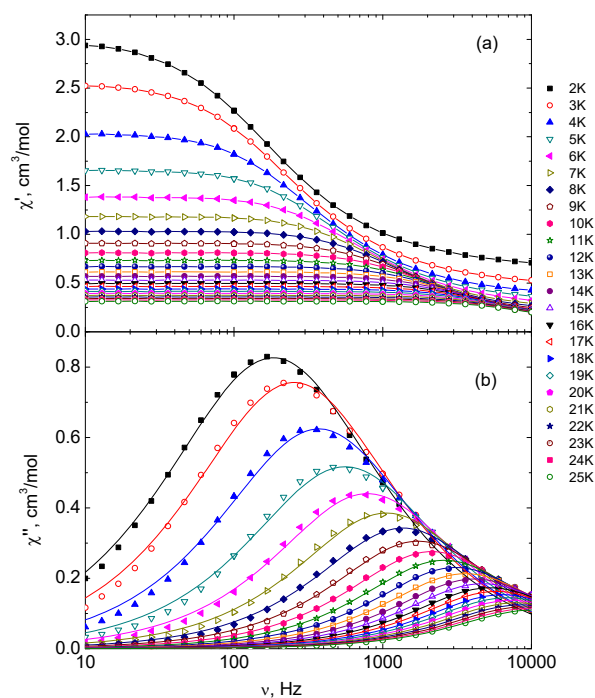

**Figure S21.** Frequency dependencies of the real (a) and imaginary (b) components of the *ac*-magnetic susceptibility for complex **3** in the 2–25 K range taken under the optimal 2500 Oe *dc*-field. Solid lines are visual guides (a), represent fitting by the generalized Debye model (b).

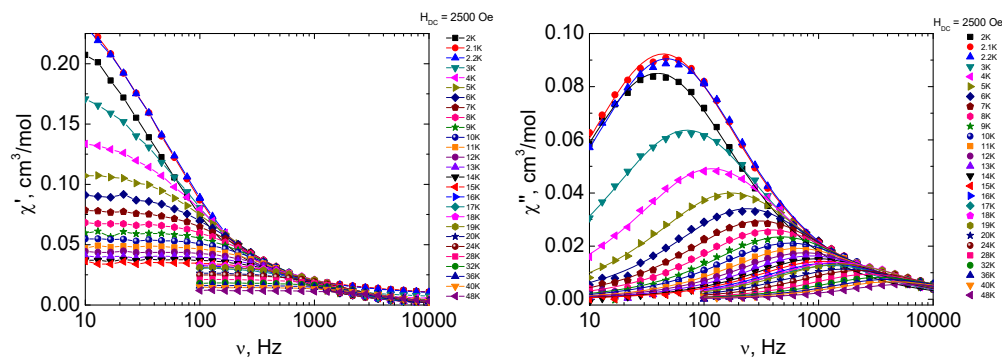

**Figure S22.** Frequency dependencies of the real (left) and imaginary (right) components of the *ac*-magnetic susceptibility for complex **1<sub>La</sub>** in the 2–48 K range taken under the optimal 2500 Oe *dc*-field. Solid lines are visual guides (left), represent fitting by the generalized Debye model (right).



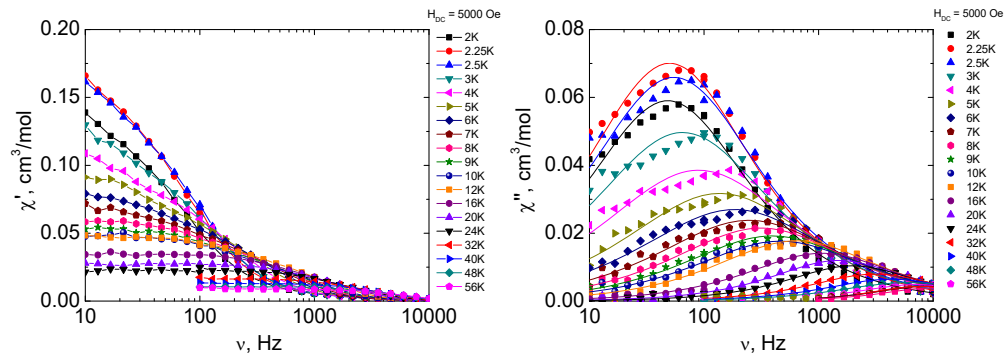

**Figure S23.** Frequency dependencies of the real (left) and imaginary (right) components of the *ac*-magnetic susceptibility for complex **1v** in the 2–56 K range taken under the optimal 5000 Oe *dc*-field. Solid lines are visual guides (left), represent fitting by the generalized Debye model (right).

**Table S14.** Fitting of the  $\tau$  vs.  $T$  dependences for **1**.

Dependence of the relaxation time  $\tau$  on the reciprocal temperature for complex **1** ( $H = 5$  kOe,  $T = 6$ –32 K).

Fit function, temperature range, and the best-fit parameters with uncertainties.

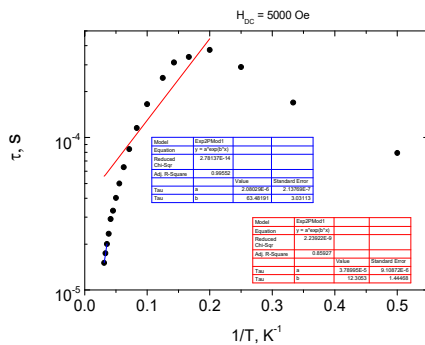

**Orbach**

$$\tau = \tau_0 \exp(\Delta E/kT)$$

$$T = 28\text{--}32 \text{ K}$$

$$\Delta E/k = 63 \pm 3 \text{ K}$$

$$\tau_0 = 2.1 \cdot 10^{-6} \pm 2 \cdot 10^{-7} \text{ s}$$

$$R^2 = 0.99552 \text{ (blue line)}$$

$T = 6\text{--}32 \text{ K}$

$$\Delta E/k = 12 \pm 1 \text{ K}$$

$$\tau_0 = 3.8 \cdot 10^{-5} \pm 9 \cdot 10^{-6} \text{ s}$$

$$R^2 = 0.85927 \text{ (red line)}$$

Unsatisfactory fit

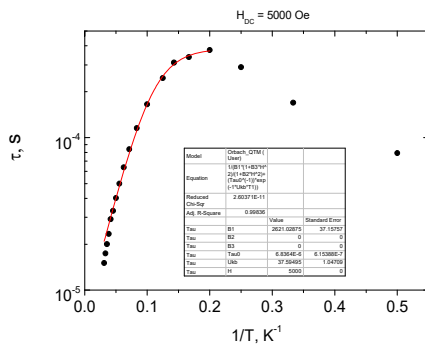

**Orbach+ QTM**

$$\tau^{-1} = \tau_0^{-1} \exp(-\Delta E/kT) + B$$

$$T = 6\text{--}32 \text{ K}$$

$$\Delta E/k = 38 \pm 1 \text{ K}$$

$$\tau_0 = 6.8 \cdot 10^{-6} \pm 6 \cdot 10^{-7} \text{ s}$$

$$B = 2621 \pm 37 \text{ s}^{-1}$$

$$R^2 = 0.99836$$

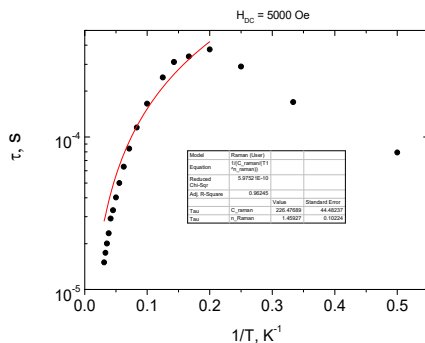

**Raman**

$$\tau^{-1} = C_{\text{Raman}} T^{n_{\text{Raman}}}$$

$$T = 6\text{--}32 \text{ K}$$

$$C_{\text{Raman}} = 226 \pm 44 \text{ s}^{-1} \text{K}^{-n_{\text{Raman}}}$$

$$n_{\text{Raman}} = 1.5 \pm 0.1$$

$$R^2 = 0.96245$$

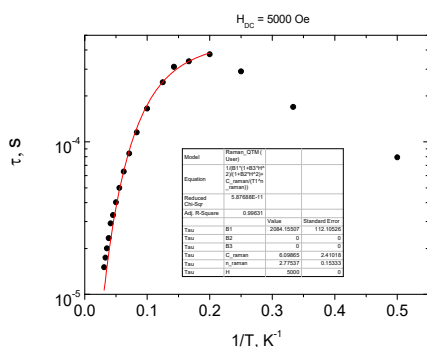**Raman+ QTM**

$$\tau^{-1} = C_{\text{Raman}} T^{n_{\text{Raman}}} + B$$

$$T = 6\text{--}32 \text{ K}$$

$$C_{\text{Raman}} = 6 \pm 2 \text{ s}^{-1} \text{K}^{-n_{\text{Raman}}}$$

$$n_{\text{Raman}} = 2.8 \pm 0.2$$

$$B = 2084 \pm 112 \text{ s}^{-1}$$

$$R^2 = 0.99631$$

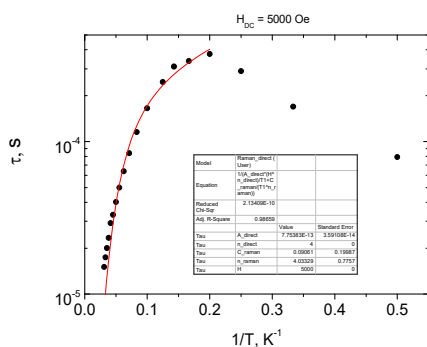**Raman+Direct**

$$\tau^{-1} = C_{\text{Raman}} T^{n_{\text{Raman}}} + A_{\text{direct}} T^4$$

$$T = 6\text{--}32 \text{ K}$$

$$C_{\text{Raman}} = 0.09 \pm 0.2 \text{ s}^{-1} \text{K}^{-n_{\text{Raman}}}$$

$$n_{\text{Raman}} = 4.0 \pm 0.8$$

$$A_{\text{direct}} = 7.8 \cdot 10^{-13} \pm 4 \cdot 10^{-14} \text{ K}^{-1} \text{Oe}^{-4} \text{s}^{-1}$$

$$R^2 = 0.98659$$

Unsatisfactory fit

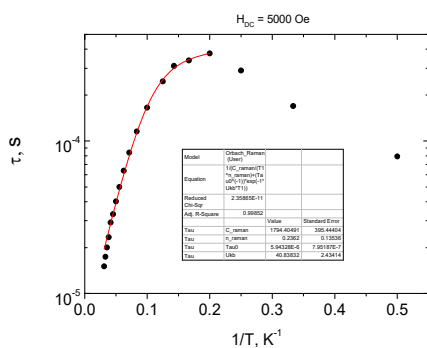**Orbach+Raman**

$$\tau^{-1} = \tau_0^{-1} \cdot \exp(-\Delta E/kT) + C_{\text{Raman}} T^{n_{\text{Raman}}}$$

$$T = 6\text{--}32 \text{ K}$$

$$\Delta E/k = 41 \pm 2 \text{ K}$$

$$\tau_0 = 5.9 \cdot 10^{-6} \pm 8 \cdot 10^{-7} \text{ s}$$

$$C_{\text{Raman}} = 1794 \pm 395 \text{ s}^{-1} \text{K}^{-n_{\text{Raman}}}$$

$$n_{\text{Raman}} = 0.2 \pm 0.1$$

$$R^2 = 0.99852$$

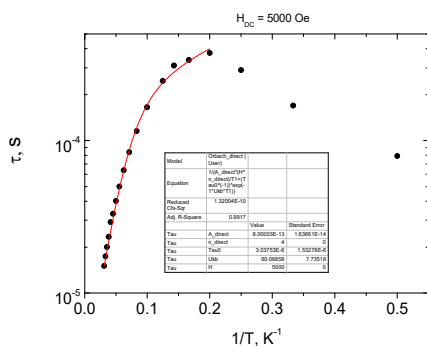**Orbach+Direct**

$$\tau^{-1} = \tau_0^{-1} \cdot \exp(-\Delta E/kT) + A_{\text{direct}} T^4$$

$$T = 6\text{--}32 \text{ K}$$

$$\Delta E/k = 60 \pm 8 \text{ K}$$

$$\tau_0 = 3 \cdot 10^{-6} \pm 2 \cdot 10^{-6} \text{ s}$$

$$A_{\text{direct}} = 8.0 \cdot 10^{-13} \pm 2 \cdot 10^{-14} \text{ K}^{-1} \text{Oe}^{-4} \text{s}^{-1}$$

$$R^2 = 0.9917$$

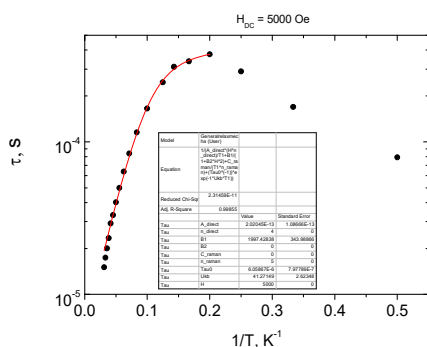**Orbach+Direct+QTM**

$$\tau^{-1} = \tau_0^{-1} \cdot \exp(-\Delta E/kT) + B + A_{\text{direct}} T H^4$$

$$T = 6-32 \text{ K}$$

$$\Delta E/k = 41 \pm 3 \text{ K}$$

$$\tau_0 = 6.1 \cdot 10^{-6} \pm 8 \cdot 10^{-7} \text{ s}$$

$$A_{\text{direct}} = 2 \cdot 10^{-13} \pm 1 \cdot 10^{-13} \text{ K}^{-1} \text{Oe}^{-4} \text{s}^{-1}$$

$$B = 1997 \pm 344$$

$$R^2 = 0.99855$$

*Over-parametrization*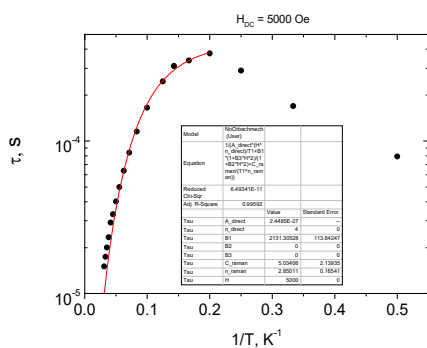**Raman+Direct+QTM**

$$\tau^{-1} = C_{\text{Raman}} T^{n_{\text{Raman}}} + B + A_{\text{direct}} T H^4$$

$$T = 6-32 \text{ K}$$

$$C_{\text{Raman}} = 5 \pm 2 \text{ s}^{-1} \text{K}^{-n_{\text{Raman}}}$$

$$n_{\text{Raman}} = 2.9 \pm 0.2$$

$$A_{\text{direct}} = 2 \cdot 10^{-27} \text{ K}^{-1} \text{Oe}^{-4} \text{s}^{-1}$$

$$B = 2131 \pm 114$$

$$R^2 = 0.99592$$

*Unsuccessful fit*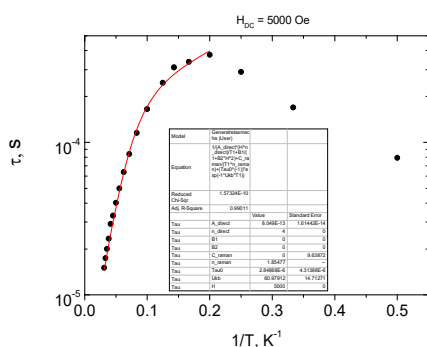**Orbach+Raman+Direct**

$$\tau^{-1} = \tau_0^{-1} \cdot \exp(-\Delta E/kT) + C_{\text{Raman}} T^{n_{\text{Raman}}} + A_{\text{direct}} T H^4$$

$$T = 6-32 \text{ K}$$

$$\Delta E/k = 61 \pm 15 \text{ K}$$

$$\tau_0 = 3 \cdot 10^{-6} \pm 4 \cdot 10^{-6} \text{ s}$$

$$C_{\text{Raman}} = 0 \pm 10 \text{ s}^{-1} \text{K}^{-n_{\text{Raman}}}$$

$$n_{\text{Raman}} = 1.9$$

$$A_{\text{direct}} = 8.0 \cdot 10^{-13} \pm 2 \cdot 10^{-14} \text{ K}^{-1} \text{Oe}^{-4} \text{s}^{-1}$$

$$R^2 = 0.99011$$

*Over-parametrization**Unsuccessful fit*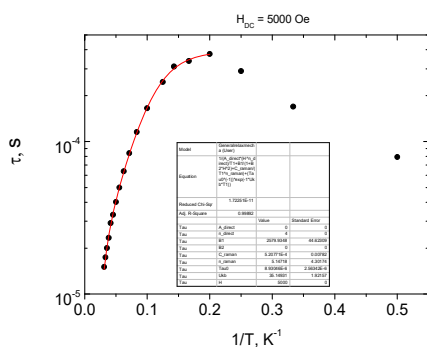**Orbach+Raman+QTM**

$$\tau^{-1} = \tau_0^{-1} \cdot \exp(-\Delta E/kT) + C_{\text{Raman}} T^{n_{\text{Raman}}} + B$$

$$T = 6-32 \text{ K}$$

$$\Delta E/k = 35 \pm 2 \text{ K}$$

$$\tau_0 = 9 \cdot 10^{-6} \pm 3 \cdot 10^{-6} \text{ s}$$

$$C_{\text{Raman}} = 5 \cdot 10^{-4} \pm 8 \cdot 10^{-3} \text{ s}^{-1} \text{K}^{-n_{\text{Raman}}}$$

$$n_{\text{Raman}} = 5 \pm 4$$

$$B = 2580 \pm 45$$

$$R^2 = 0.99892$$

*Over-parametrization*

Table S15. Fitting of the  $\tau$  vs.  $T$  dependences for 2.

Dependence of the relaxation time  $\tau$  on the reciprocal temperature for complex 2 ( $H = 2.5$  kOe,  $T = 2$ –22 K).

Fit function, temperature range, and the best-fit parameters with uncertainties.

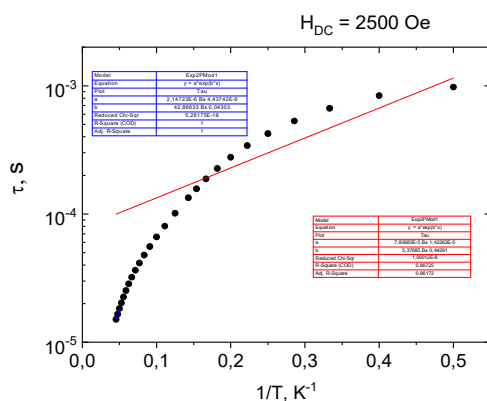

**Orbach**

$$\tau = \tau_0 \exp(\Delta E/kT)$$

$$T = 20\text{--}22 \text{ K}$$

$$\Delta E/k = 42.87 \pm 0.04 \text{ K}$$

$$\tau_0 = 2.147 \cdot 10^{-6} \pm 4 \cdot 10^{-9} \text{ s}$$

$$R^2 = 1 \text{ (blue line)}$$

$$T = 2\text{--}22 \text{ K}$$

$$\Delta E/k = 5.4 \pm 0.4 \text{ K}$$

$$\tau_0 = 8 \cdot 10^{-5} \pm 1 \cdot 10^{-5} \text{ s}$$

$$R^2 = 0.86725 \text{ (red line)}$$

Unsatisfactory fit

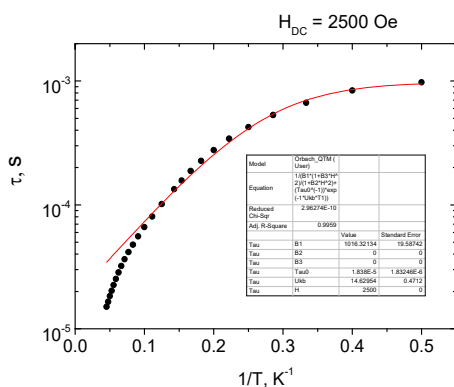

**Orbach+ QTM**

$$\tau^{-1} = \tau_0^{-1} \exp(-\Delta E/kT) + B$$

$$T = 2\text{--}22 \text{ K}$$

$$\Delta E/k = 14.6 \pm 0.5 \text{ K}$$

$$\tau_0 = 1.8 \cdot 10^{-5} \pm 2 \cdot 10^{-6} \text{ s}$$

$$B = 1016 \pm 20 \text{ s}^{-1}$$

$$R^2 = 0.9959$$

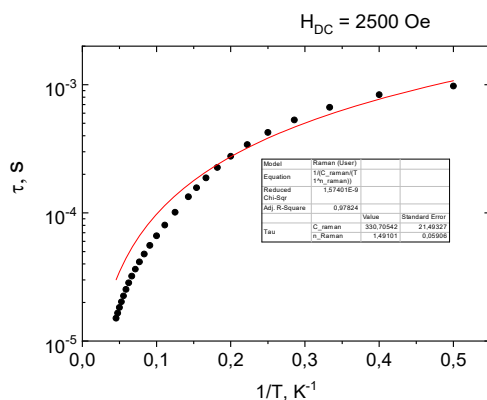

**Raman**

$$\tau^{-1} = C_{\text{Raman}} T^{n_{\text{Raman}}}$$

$$T = 2\text{--}22 \text{ K}$$

$$C_{\text{Raman}} = 331 \pm 21 \text{ s}^{-1} \text{K}^{-n_{\text{Raman}}}$$

$$n_{\text{Raman}} = 1.49 \pm 0.06$$

$$R^2 = 0.97824$$

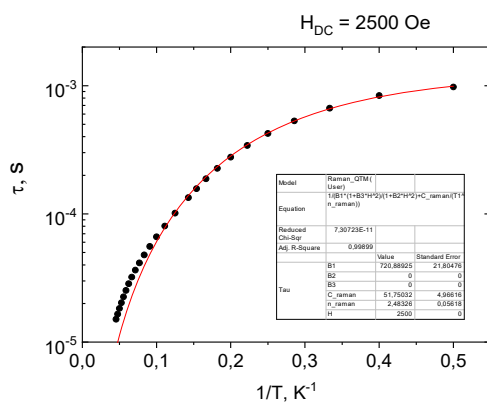**Raman+ QTM**

$$\tau^{-1} = C_{Raman} T^{n_{Raman}} + B$$

$$T = 2-22 \text{ K}$$

$$C_{Raman} = 52 \pm 5 \text{ s}^{-1} \text{K}^{-n_{Raman}}$$

$$n_{Raman} = 2.48 \pm 0.06$$

$$B = 721 \pm 22 \text{ s}^{-1}$$

$$R^2 = 0.99899$$

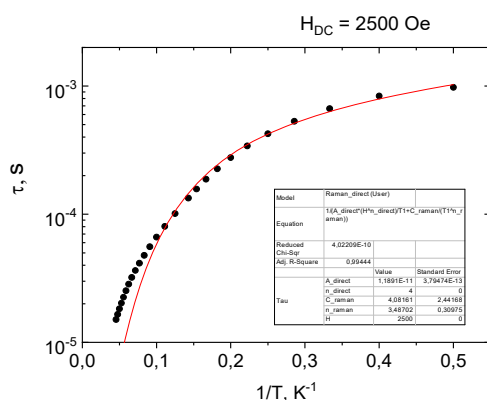**Raman+Direct**

$$\tau^{-1} = C_{Raman} T^{n_{Raman}} + A_{direct} T H^4$$

$$T = 2-22 \text{ K}$$

$$C_{Raman} = 4 \pm 2 \text{ s}^{-1} \text{K}^{-n_{Raman}}$$

$$n_{Raman} = 3.5 \pm 0.3$$

$$A_{direct} = 1.19 \cdot 10^{-11} \pm 4 \cdot 10^{-13} \text{ K}^{-1} \text{Oe}^{-4} \text{s}^{-1}$$

$$R^2 = 0.99444$$

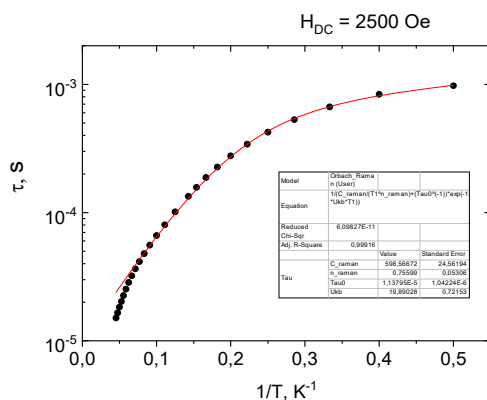**Orbach+Raman**

$$\tau^{-1} = \tau_0^{-1} \cdot \exp(-\Delta E/kT) + C_{Raman} T^{n_{Raman}}$$

$$T = 2-22 \text{ K}$$

$$\Delta E/k = 19.9 \pm 0.7 \text{ K}$$

$$\tau_0 = 1.1 \cdot 10^{-5} \pm 1 \cdot 10^{-6} \text{ s}$$

$$C_{Raman} = 599 \pm 25 \text{ s}^{-1} \text{K}^{-n_{Raman}}$$

$$n_{Raman} = 0.76 \pm 0.05$$

$$R^2 = 0.99916$$

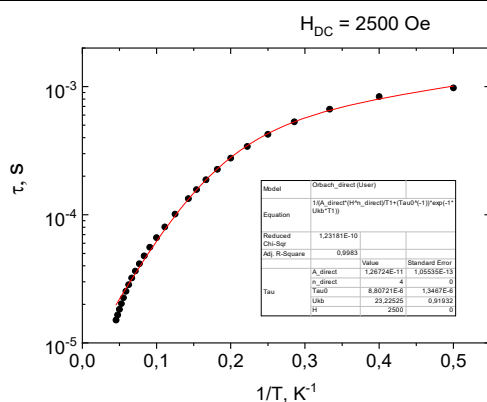**Orbach+Direct**

$$\tau^{-1} = \tau_0^{-1} \cdot \exp(-\Delta E/kT) + A_{direct} T H^4$$

$$T = 2-22 \text{ K}$$

$$\Delta E/k = 23.2 \pm 0.9 \text{ K}$$

$$\tau_0 = 9 \cdot 10^{-6} \pm 1 \cdot 10^{-6} \text{ s}$$

$$A_{direct} = 1.27 \cdot 10^{-11} \pm 1 \cdot 10^{-13} \text{ K}^{-1} \text{Oe}^{-4} \text{s}^{-1}$$

$$R^2 = 0.9983$$

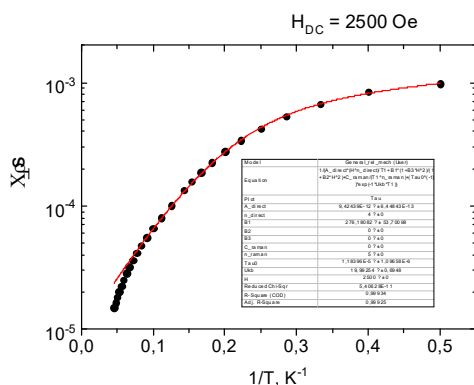**Orbach+Direct+QTM**

$$\tau^{-1} = \tau_0^{-1} \cdot \exp(-\Delta E/kT) + B + A_{direct} T^4$$

$$T = 2-22 \text{ K}$$

$$\Delta E/k = 20.0 \pm 0.7 \text{ K}$$

$$\tau_0 = 1.2 \cdot 10^{-5} \pm 1 \cdot 10^{-6} \text{ s}$$

$$A_{direct} = 9.4 \cdot 10^{-12} \pm 6 \cdot 10^{-13} \text{ K}^{-1} \text{Oe}^{-4} \text{s}^{-1}$$

$$B = 276 \pm 58$$

$$R^2 = 0.99925$$

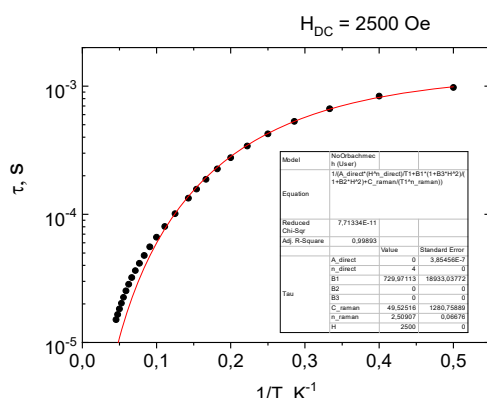**Raman+Direct+QTM**

$$\tau^{-1} = C_{Raman} T^{n_{Raman}} + B + A_{direct} T^4$$

$$T = 2-22 \text{ K}$$

$$C_{Raman} = 50 \pm 1281 \text{ s}^{-1} \text{K}^{-n_{Raman}}$$

$$n_{Raman} = 2.51 \pm 0.07$$

$$A_{direct} = 0 \pm 4 \cdot 10^{-7} \text{ K}^{-1} \text{Oe}^{-4} \text{s}^{-1}$$

$$B = 730 \pm 18933$$

$$R^2 = 0.99893$$

Over-parametrization

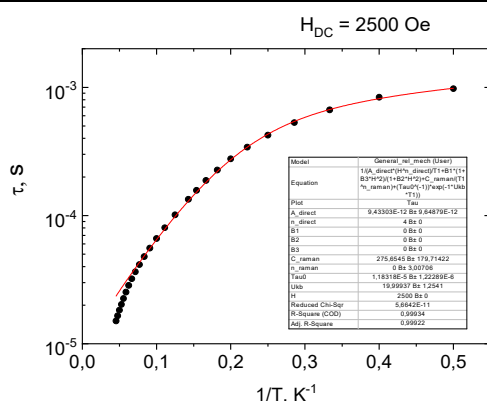**Orbach+Raman+Direct**

$$\tau^{-1} = \tau_0^{-1} \cdot \exp(-\Delta E/kT) + C_{Raman} T^{n_{Raman}} + A_{direct} T^4$$

$$T = 2-22 \text{ K}$$

$$\Delta E/k = 20 \pm 1 \text{ K}$$

$$\tau_0 = 1.2 \cdot 10^{-5} \pm 1 \cdot 10^{-6} \text{ s}$$

$$C_{Raman} = 276 \pm 180 \text{ s}^{-1} \text{K}^{-n_{Raman}}$$

$$n_{Raman} = 0 \pm 3$$

$$A_{direct} = 9 \cdot 10^{-12} \pm 9 \cdot 10^{-12} \text{ K}^{-1} \text{Oe}^{-4} \text{s}^{-1}$$

$$R^2 = 0.99922$$

Over-parametrization

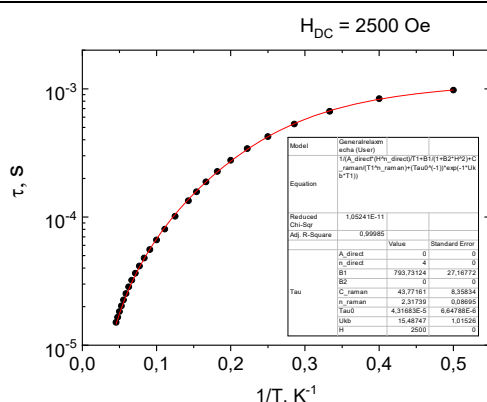**Orbach+Raman+QTM**

$$\tau^{-1} = \tau_0^{-1} \cdot \exp(-\Delta E/kT) + C_{Raman} T^{n_{Raman}} + B$$

$$T = 2-22 \text{ K}$$

$$\Delta E/k = 15 \pm 1 \text{ K}$$

$$\tau_0 = 4.3 \cdot 10^{-5} \pm 7 \cdot 10^{-6} \text{ s}$$

$$C_{Raman} = 44 \pm 8 \text{ s}^{-1} \text{K}^{-n_{Raman}}$$

$$n_{Raman} = 2.32 \pm 0.09$$

$$B = 794 \pm 27$$

$$R^2 = 0.99985$$



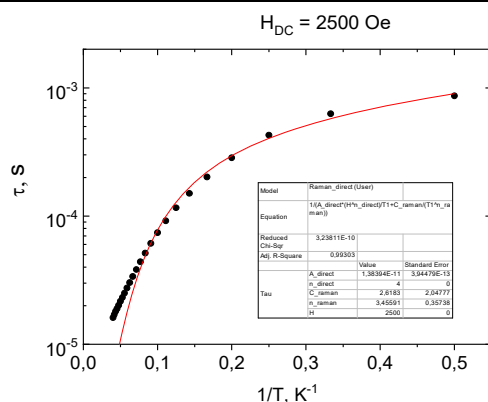**Raman+Direct**

$$\tau^{-1} = C_{Raman} T^{n_{Raman}} + A_{direct} T H^4$$

$$T = 2-25 \text{ K}$$

$$C_{Raman} = 2.6 \pm 2.0 \text{ s}^{-1} \text{K}^{-n_{Raman}}$$

$$n_{Raman} = 3.5 \pm 0.4$$

$$A_{direct} = 1.38 \cdot 10^{-11} \pm 4 \cdot 10^{-13} \text{ K}^{-1} \text{Oe}^{-4} \text{s}^{-1}$$

$$R^2 = 0.99303$$

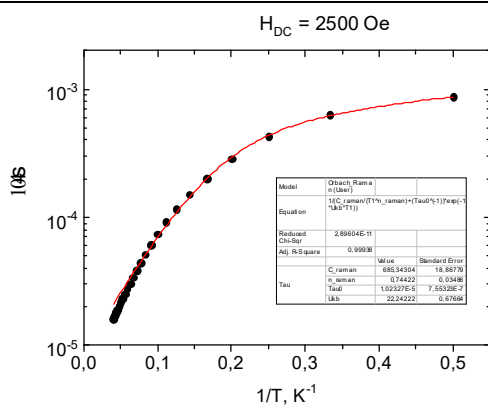**Orbach+Raman**

$$\tau^{-1} = \tau_0^{-1} \cdot \exp(-\Delta E/kT) + C_{Raman} T^{n_{Raman}}$$

$$T = 2-25 \text{ K}$$

$$\Delta E/k = 22.2 \pm 0.7 \text{ K}$$

$$\tau_0 = 1.02 \cdot 10^{-5} \pm 8 \cdot 10^{-7} \text{ s}$$

$$C_{Raman} = 685 \pm 19 \text{ s}^{-1} \text{K}^{-n_{Raman}}$$

$$n_{Raman} = 0.74 \pm 0.03$$

$$R^2 = 0.99938$$

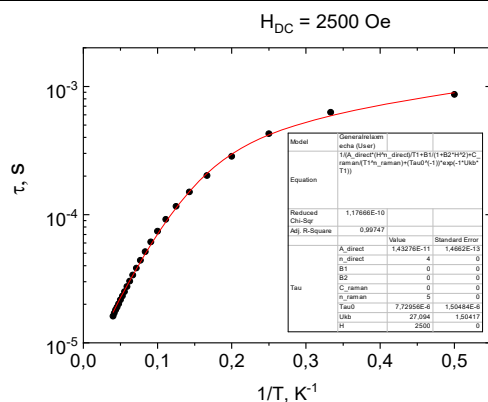**Orbach+Direct**

$$\tau^{-1} = \tau_0^{-1} \cdot \exp(-\Delta E/kT) + A_{direct} T H^4$$

$$T = 2-25 \text{ K}$$

$$\Delta E/k = 27 \pm 2 \text{ K}$$

$$\tau_0 = 8 \cdot 10^{-6} \pm 2 \cdot 10^{-6} \text{ s}$$

$$A_{direct} = 1.43 \cdot 10^{-11} \pm 1 \cdot 10^{-13} \text{ K}^{-1} \text{Oe}^{-4} \text{s}^{-1}$$

$$R^2 = 0.99747$$

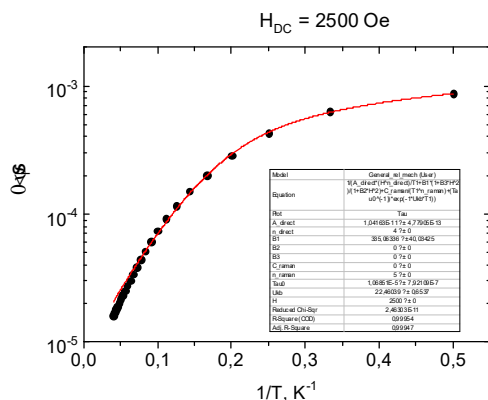**Orbach+Direct+QTM**

$$\tau^{-1} = \tau_0^{-1} \cdot \exp(-\Delta E/kT) + B + A_{direct} T H^4$$

$$T = 2-25 \text{ K}$$

$$\Delta E/k = 22.5 \pm 0.7 \text{ K}$$

$$\tau_0 = 1.07 \cdot 10^{-5} \pm 8 \cdot 10^{-7} \text{ s}$$

$$A_{direct} = 1.04 \cdot 10^{-11} \pm 5 \cdot 10^{-13} \text{ K}^{-1} \text{Oe}^{-4} \text{s}^{-1}$$

$$B = 335 \pm 40$$

$$R^2 = 0.99947$$



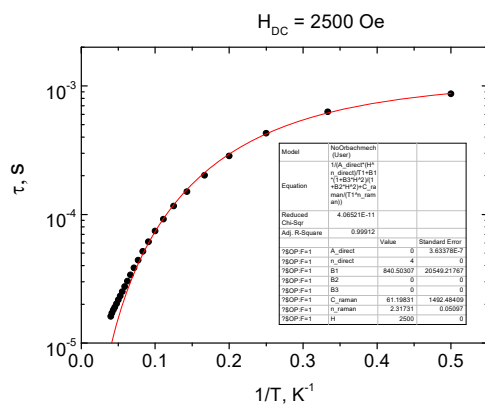**Raman+Direct+QTM**

$$\tau^{-1} = C_{Raman} T^{n_{Raman}} + B + A_{direct} T H^4$$

$$T = 2-25 \text{ K}$$

$$C_{Raman} = 61 \pm 1492 \text{ s}^{-1} \text{K}^{-n_{Raman}}$$

$$n_{Raman} = 2.32 \pm 0.05$$

$$A_{direct} = 0 \pm 4 \cdot 10^{-7} \text{ K}^{-1} \text{Oe}^{-4} \text{s}^{-1}$$

$$B = 841 \pm 20549$$

$$R^2 = 0.99912$$

*Over-parametrization*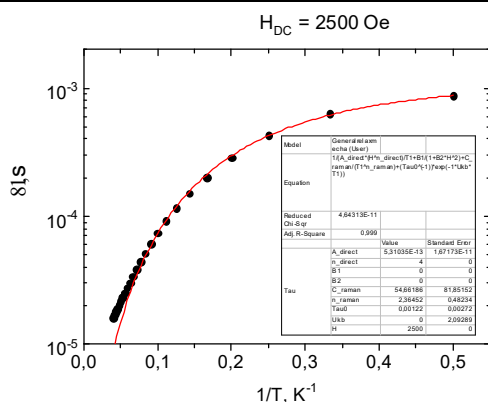**Orbach+Raman+Direct**

$$\tau^{-1} = \tau_0^{-1} \cdot \exp(-\Delta E/kT) + C_{Raman} T^{n_{Raman}} + A_{direct} T H^4$$

$$T = 2-25 \text{ K}$$

$$\Delta E/k = 0 \pm 2 \text{ K}$$

$$\tau_0 = 0.001 \pm 0.003 \text{ s}$$

$$C_{Raman} = 55 \pm 82 \text{ s}^{-1} \text{K}^{-n_{Raman}}$$

$$n_{Raman} = 2.4 \pm 0.5$$

$$A_{direct} = 5 \cdot 10^{-13} \pm 2 \cdot 10^{-11} \text{ K}^{-1} \text{Oe}^{-4} \text{s}^{-1}$$

$$R^2 = 0.999$$

*Over-parametrization*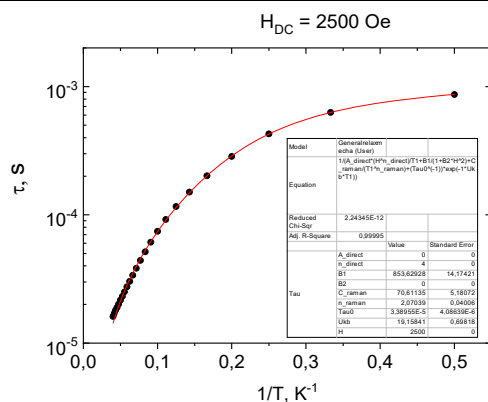**Orbach+Raman+QTM**

$$\tau^{-1} = \tau_0^{-1} \cdot \exp(-\Delta E/kT) + C_{Raman} T^{n_{Raman}} + B$$

$$T = 2-25 \text{ K}$$

$$\Delta E/k = 19.2 \pm 0.7 \text{ K}$$

$$\tau_0 = 3.4 \cdot 10^{-5} \pm 4 \cdot 10^{-6} \text{ s}$$

$$C_{Raman} = 71 \pm 5 \text{ s}^{-1} \text{K}^{-n_{Raman}}$$

$$n_{Raman} = 2.07 \pm 0.04$$

$$B = 854 \pm 14$$

$$R^2 = 0.99995$$

## S-IV. DFT calculations

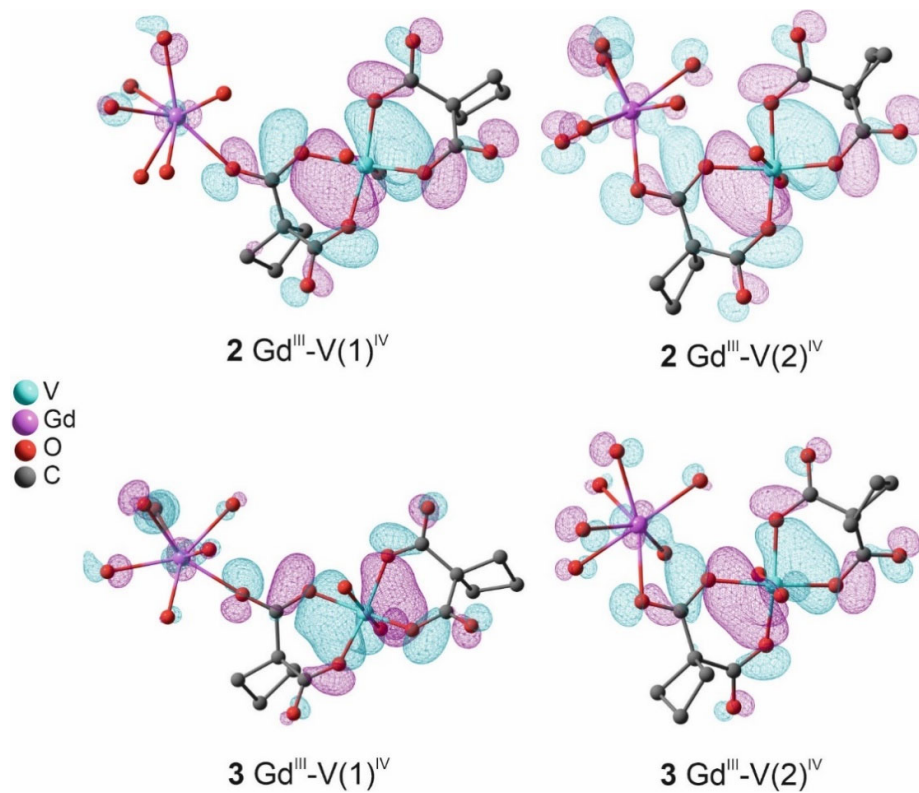

**Figure S24.** Natural orbitals of V<sup>IV</sup>-Gd<sup>III</sup> fragments of the compounds **2** and **3** calculated by the DFT UB3LYP/6-31G(d,p)/SDD with inclusion of relativistic effects *via* the Douglas-Kroll-Hess method. Hydrogen atoms are omitted, cutoff = 0.015 e/Å<sup>3</sup>.

### S-V. Powder X-ray Diffraction

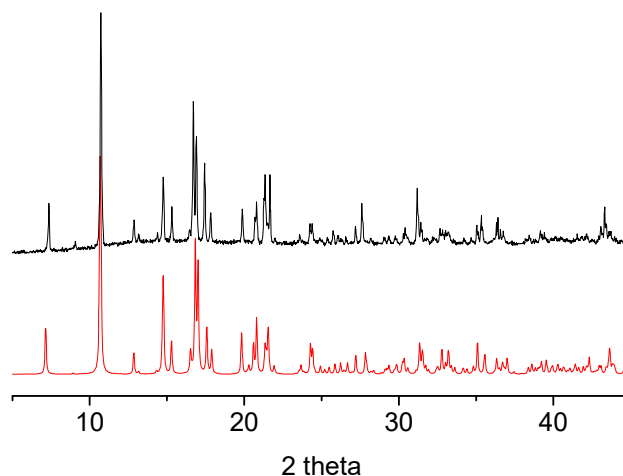

**Figure S25.** Experimental PXRD pattern for **1** measured at 273 K (black line) and its comparison with calculated data (red line).

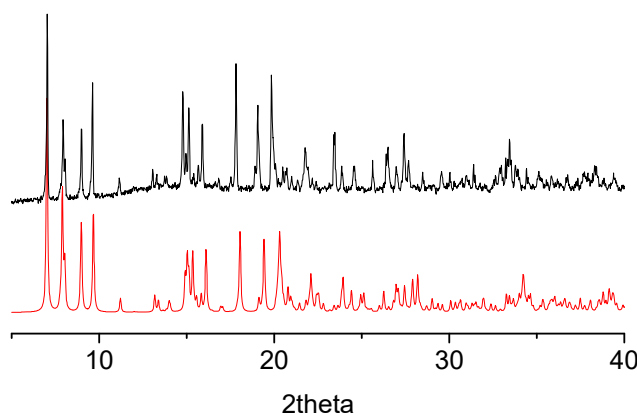

**Figure S26.** Experimental PXRD pattern for **2** measured at 273 K (black line) and its comparison with calculated data (red line).

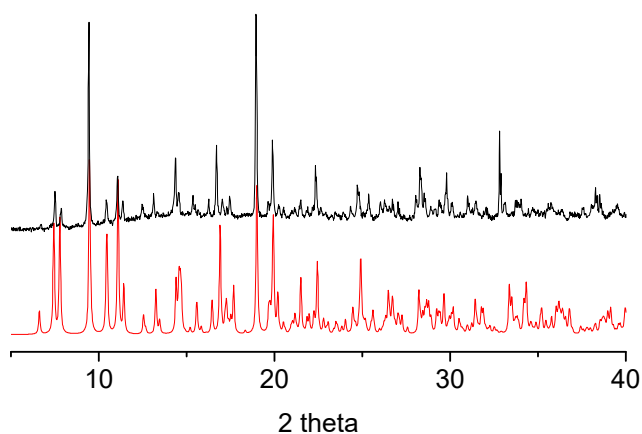

**Figure S27.** Experimental PXRD pattern for **3** measured at 273 K (black line) and its comparison with calculated data (red line).

## References

- S1.→ Kurganskii, I.V.; Bazhina, E.S.; Korlyukov, A.A.; Babeshkin, K.A.; Efimov, N.N.; Kiskin, M.A.; Veber, S.L.; Sidorov, A.A.; Eremenko, I.L.; Fedin, M.V. Mapping Magnetic Properties and Relaxation in Vanadium(IV) Complexes with Lanthanides by Electron Paramagnetic Resonance. *Molecules* **2019**, *24*, 4582.
- S2.→ Chilton, N.F.; Anderson, R.P.; Turner, L.D.; Soncini, A.; Murray, K.S. PHI: a powerful new program for the analysis of anisotropic monomeric and exchange-coupled polynuclear d- and f-block complexes. *J. Comput. Chem.* **2013**, *34*, 1164.
